1 **The insulin receptor adaptor IRS2 is an APC/C substrate that promotes cell cycle**  
2 **protein expression and a robust spindle assembly checkpoint**

3

4 Sandhya Manohar<sup>1</sup>, Qing Yu<sup>1</sup>, Steven P. Gygi<sup>1</sup>, Randall W. King<sup>1,2\*</sup>

5

6 1. Department of Cell Biology, Harvard Medical School, Boston, Massachusetts 02115,  
7 USA.

8 2. Lead contact

9 \* Correspondence: [randy\\_king@hms.harvard.edu](mailto:randy_king@hms.harvard.edu)

10

11 **Summary**

12 Insulin receptor substrate 2 (IRS2) is an essential adaptor that mediates signaling  
13 downstream of the insulin receptor and other receptor tyrosine kinases. Transduction  
14 through IRS2-dependent pathways is important for coordinating metabolic homeostasis,  
15 and dysregulation of IRS2 causes systemic insulin signaling defects. Despite the  
16 importance of maintaining proper IRS2 abundance, little is known about what factors  
17 mediate its protein stability. We conducted an unbiased proteomic screen to uncover  
18 novel substrates of the Anaphase Promoting Complex/Cyclosome (APC/C), a ubiquitin  
19 ligase that controls the abundance of key cell cycle regulators. Surprisingly, we found that  
20 IRS2 levels are regulated by APC/C activity and that IRS2 is a direct APC/C target in G<sub>1</sub>.  
21 Consistent with the APC/C's role in degrading cell cycle regulators, we find that IRS2-null  
22 cells are deficient in proteins involved in cell cycle progression and display spindle  
23 assembly checkpoint defects during M-phase. Together, these findings reveal a new  
24 pathway for IRS2 turnover and indicate that IRS2 is a critical component of the cell cycle  
25 control system in addition to acting as an essential metabolic regulator.

26

27 **Keywords**

28 Anaphase-Promoting Complex/Cyclosome; ubiquitin; cell cycle; insulin signaling  
29 pathway; G<sub>1</sub>

30

31

## 32 **Introduction**

33           The insulin and insulin-like growth factor 1 receptors (IR/IGF1R) are receptor  
34 tyrosine kinases that control metabolism, differentiation, and growth. Upon ligand binding  
35 at the cell surface, the activated IR/IGF1R undergoes a conformational change that allows  
36 it to auto-phosphorylate tyrosine residues on its cytoplasmic subunits (Haeusler et al.,  
37 2017). This facilitates the recruitment and phosphorylation of insulin receptor substrate  
38 (IRS) proteins, which serve as scaffolds to initiate downstream signaling (Copps and  
39 White, 2012). Two major pathways that are stimulated by this cascade are the PI3K-AKT  
40 and Ras-Raf-MAPK pathways, which coordinate metabolic homeostasis and growth,  
41 among other functions (Haeusler et al., 2017).

42           The most physiologically important and ubiquitously expressed IRS proteins are  
43 IRS1 and IRS2. Though IRS1 and IRS2 share similar structural and functional features,  
44 they have complementary roles and expression patterns that depend on tissue type and  
45 physiological state (Haeusler et al., 2017). These differences are illustrated by divergent  
46 phenotypes in knockout mice: whereas IRS1 knockout mice exhibit insulin resistance that  
47 is compensated by increased pancreatic  $\beta$  cell mass, IRS2 knockout mice exhibit  $\beta$  cell  
48 failure and resultant diabetes (Lavin et al., 2016). Distinct roles for IRS1 and IRS2 can  
49 also be observed within the same tissue. For example, in skeletal muscle, IRS1 is  
50 required for glucose uptake and metabolism, whereas IRS2 is important for lipid uptake  
51 and metabolism (Bouzakri et al., 2006; Long et al., 2011). Furthermore, recent work has  
52 shown that the ratio of IRS1 to IRS2 is important for hepatic glucose metabolism (Besse-  
53 Patin et al., 2019). Thus, maintaining proper IRS1 and IRS2 levels is critical for systemic  
54 and cellular homeostasis.

55           The ubiquitin-mediated proteolysis of IRS proteins is important for restraining  
56 signaling through the IR/IGF1R. For example, both IRS proteins are targeted for  
57 proteasomal destruction following persistent insulin or IGF1 stimulation in a negative  
58 feedback loop that attenuates PI3K-AKT signaling (Copps and White, 2012; Scheufele et  
59 al., 2014). In mice, removal of a ubiquitin ligase that is responsible for IGF1-induced  
60 degradation of IRS1 enhances insulin sensitivity and increases plasma glucose clearance  
61 (Scheufele et al., 2014). Though several ubiquitin ligases have been reported to control  
62 IRS1's proteasome-dependent degradation (Nakao et al., 2009; Rui et al., 2002; Shi et

63 al., 2011; Xu et al., 2008; Yi et al., 2013), only SOCS1/3 have been implicated in driving  
64 IRS2 turnover (Rui et al., 2002). This is an intriguing disparity because hepatic IRS1  
65 remains stable between fasting and feeding whereas IRS2 levels drop after feeding  
66 (Kubota et al., 2008), suggesting that IRS2 is less stable than IRS1 in some physiological  
67 contexts. Because SOCS1/3 also targets IRS1, there are no reports of ubiquitin ligases  
68 that target IRS2 but not IRS1, leaving a gap in our knowledge of how IRS1 and IRS2 are  
69 differentially regulated by the ubiquitin proteasome system.

70 The Anaphase-Promoting Complex/Cyclosome (APC/C) is a 1.2 mDa ubiquitin  
71 ligase that targets key cell cycle related proteins for destruction by the proteasome (Alfieri  
72 et al., 2017; Chang and Barford, 2014). To transfer ubiquitin to its substrates, the APC/C  
73 works with one of two co-activators: Cdc20 during M-phase or Cdh1 during G<sub>1</sub>. These co-  
74 activators stimulate the catalytic activity of the APC/C and facilitate substrate recognition.  
75 APC/C<sup>Cdc20</sup> and APC/C<sup>Cdh1</sup> recognize substrates via short degron motifs in unstructured  
76 protein regions called destruction boxes (D-boxes) and KEN-boxes. An additional degron,  
77 called the ABBA motif, is used by APC/C<sup>Cdc20</sup> only (Alfieri et al., 2017; Chang and Barford,  
78 2014; Davey and Morgan, 2016).

79 To probe the substrate landscape of the APC/C, we conducted an unbiased  
80 proteomic screen by acutely blocking APC/C<sup>Cdh1</sup> activity with small molecule APC/C  
81 inhibitors (apcin and proTAME) (Sackton et al., 2014; Zeng et al., 2010) in G<sub>1</sub> cells. Using  
82 this approach, we uncovered diverse putative APC/C<sup>Cdh1</sup> substrates, including IRS2. We  
83 demonstrate that IRS2, but not IRS1, is a direct target of APC/C<sup>Cdh1</sup>, thereby establishing  
84 a novel mode by which IRS1 and IRS2 are differentially regulated. Using IRS2 knockout  
85 cell lines, we show that IRS2 is important for the expression of proteins involved in cell  
86 cycle progression. We further show that genetic deletion of IRS2 perturbs spindle  
87 assembly checkpoint function. Taken together, these data establish a role for IRS2 in  
88 normal cell cycle progression, revealing new connections between an essential  
89 component of the growth factor signaling network and cell cycle regulation.

90

## 91 **Results**

92 *Chemical proteomics reveals proteins whose abundances are APC/C<sup>Cdh1</sup> regulated*

93 To identify novel substrates and pathways regulated by APC/C<sup>Cdh1</sup>, we designed  
94 an experiment that coupled small molecule inhibition of the APC/C in G<sub>1</sub> cells to high  
95 resolution tandem mass tag (TMT)-based quantitative proteomics (**Figure 1A**). Blocking  
96 Cdk4/6 activity inhibits Rb phosphorylation, causing cells to arrest at the G<sub>1</sub> restriction  
97 point (Ezhevsky et al., 1997). Thus, to generate a homogeneous population of G<sub>1</sub> cells,  
98 we treated asynchronous hTERT-RPE1 cells bearing fluorescent ubiquitination-based  
99 cell cycle indicator (FUCCI) constructs (Sakaue-Sawano et al., 2008) with the Cdk4/6  
100 inhibitor palbociclib. Following G<sub>1</sub> arrest, cells were acutely treated with a combination of  
101 APC/C inhibitors (6 μM proTAME + 50 μM apcin) or vehicle (DMSO) for 8 hours. Cells  
102 were then collected for proteomic analysis with the expectation that APC/C-regulated  
103 proteins would be stabilized in cells treated with APC/C inhibitors compared to control  
104 cells (**Figure 1A**). The combined use of proTAME and apcin results in robust inhibition of  
105 the APC/C (Sackton et al., 2014), which guided our decision to use this treatment scheme.  
106 Moreover, this scheme was designed to specifically identify APC/C<sup>Cdh1</sup> substrates rather  
107 than APC/C<sup>Cdc20</sup> substrates since APC/C<sup>Cdh1</sup> degrades Cdc20 during G<sub>1</sub> phase (Prinz et  
108 al., 1998). Illustrating this point, Cdc20 was undetectable in G<sub>1</sub> palbociclib-arrested cells  
109 (**Figure 1B**).

110 The experimental approach outlined in **Figure 1A** was validated using the FUCCI  
111 reporter system. This system relies on the expression of two stably integrated fluorescent  
112 fusion proteins—mAG1-geminin (1-110) and mCherry-Cdt1 (30-120)—to monitor the  
113 activity of endogenous cell cycle-related ubiquitin ligases APC/C<sup>Cdh1</sup> and SCF<sup>Skp2</sup>,  
114 respectively (Sakaue-Sawano et al., 2008). As expected, cells treated with palbociclib lost  
115 mAG1-geminin (1-110) protein expression over time due to APC/C<sup>Cdh1</sup> activity while  
116 mCherry-Cdt1 (30-120) was stabilized, indicating G<sub>1</sub> arrest (**Figures S1A-S1B**). The  
117 addition of APC/C inhibitors in palbociclib-arrested cells rescued mAG1-geminin (1-110)  
118 levels (**Figures S1C-S1D**), confirming that this workflow stabilizes APC/C targets.

119 Using TMT-coupled quantitative proteomics, we identified and quantified relative  
120 abundances for ~8000 human proteins in G<sub>1</sub>-arrested cells treated with or without APC/C  
121 inhibitors in biological triplicate (**Supplementary Table S1**). Notably, we detected 38  
122 previously reported APC/C substrates in our dataset (**Figures 1C-1D; Supplementary**  
123 **Table S2**). Of these, 22 increased significantly ( $p < 0.05$ ) under conditions of APC/C

124 inhibition. As an internal control, we detected a significant increase ( $p = 3.2 \times 10^{-5}$ ) in the  
125 abundance of peptides derived from the N-terminal 110 amino acids of geminin (GMNN).  
126 These residues are shared with the mAG1-geminin (1-110) reporter expressed in this cell  
127 line, confirming earlier fluorescence-based validation of our experimental system.

128 While the majority of the previously reported APC/C<sup>Cdh1</sup> substrates that were  
129 quantified in our G<sub>1</sub> proteomic experiment were stabilized following APC/C inhibition,  
130 some remained constant. There are several possible explanations for this result. First, for  
131 proteins that were identified based on a small number of peptides, inadequate  
132 quantification may have resulted in inaccurate abundance assignments. Second, some  
133 substrates may be APC/C<sup>Cdh1</sup>-accessible only under conditions or in tissue types that  
134 were not well modeled by the experimental parameters that we used. Third, some  
135 proteins (e.g. FBXW5, ZC3HC1) (Klitzing et al., 2011; Puklowski et al., 2011) were  
136 proposed to be APC/C<sup>Cdh1</sup> substrates based on results obtained in Cdh1 overexpression  
137 systems, indicating that APC/C<sup>Cdh1</sup> activity may be sufficient but not necessary to control  
138 their levels.

139 Of the 38 previously reported APC/C substrates that we identified, the median fold  
140 change under APC/C inhibition compared to DMSO was 1.147. Based on this, to identify  
141 new APC/C substrates, we screened for proteins that: (1) had a fold change  $\geq 1.147$  under  
142 APC/C inhibition, (2) were identified and quantified based on  $>1$  peptide, and (3) had a  $p$ -  
143 value  $< 0.05$  across the three biological replicates measured in this experiment. This  
144 narrowed our analysis to a subset of 204 proteins (**Supplementary Table S3**). Because  
145 the APC/C recognizes substrates based on D-box motifs (RxxL or the extended motif  
146 RxxLxxxxN) and KEN-box motifs (KEN), we used the SLIMSearch (Short Linear Motif  
147 Search) degron prediction tool (Davey and Morgan, 2016; Krystkowiak and Davey, 2017)  
148 to scan this 204-protein subset for proteins that contain these sequences. In order to  
149 classify a putative D- or KEN-box sequence as a probable physiological degron, we  
150 applied the following restrictions on the SLIMSearch (Krystkowiak and Davey, 2017)  
151 parameters: (1) similarity score  $\geq 0.75$ ; (2) consensus similarity is medium or high; (3)  
152 disorder score  $\geq 0.4$ ; (4) the putative degron must be intracellular and exist on a non-  
153 secreted protein. These cutoffs were determined based on those met by previously  
154 validated APC/C substrates (including those not identified in our dataset) and by the

155 physical restriction that APC/C activity occurs within the cell. Based on these thresholds,  
156 our analysis identified 26 proteins as potential D- and KEN-box containing APC/C<sup>Cdh1</sup>  
157 substrates (**Table 1, Figure 1D**). Of these 26 proteins, 11 have previously been reported  
158 as direct APC/C substrates, validating internally that this analysis was useful for  
159 identifying APC/C substrates.

160

161 *IRS2 levels are controlled by Cdh1 in a proteasome-dependent manner*

162 Examining our 26-protein putative substrate list, we focused our attention on  
163 IRS2—one of two major adaptors that promotes signaling through the insulin and insulin-  
164 like growth factor 1 receptors (IR/IGF1R). Using conditions identical to those under which  
165 the proteomics experiment was conducted, we validated that IRS2 was upregulated at  
166 the protein level under APC/C inhibition in G<sub>1</sub>-arrested RPE1 cells by immunoblot (**Figure**  
167 **2A**). Seeking to further validate this result in a distinct physiological context, we asked  
168 whether APC/C inhibition in terminally differentiated C<sub>2</sub>C<sub>12</sub> myotubes also increases IRS2  
169 protein abundance. C<sub>2</sub>C<sub>12</sub> myoblasts easily differentiate into multinucleated myotubes  
170 following serum withdrawal and supplementation with growth factors (**Figures S2A-S2B**).  
171 To validate that the APC/C is active in this system, we transfected C<sub>2</sub>C<sub>12</sub> myoblasts with  
172 a model APC/C substrate (N-terminal fragment of cyclin B1 fused to EGFP; NT-CycB-  
173 GFP), allowed cells to differentiate into myotubes, and found that APC/C inhibition  
174 stabilized NT-CycB-GFP (**Figure S2C**). Similarly, we found that acute APC/C inhibition in  
175 myotubes also resulted in an accumulation of IRS2 protein (**Figure 2B**), thereby validating  
176 this finding from our G<sub>1</sub> experiment in RPE1 cells in an independent system.

177 To exclude the possibility that the change in IRS2 abundance that we observed  
178 following APC/C inhibition was due to off-target effects of the small molecule APC/C  
179 inhibitors, we depleted Cdh1 using RNAi to block APC/C<sup>Cdh1</sup> activity in RPE1, C<sub>2</sub>C<sub>12</sub>, and  
180 HeLa cells. In all three cell lines, we found that Cdh1 knockdown caused an accumulation  
181 of endogenous IRS2 compared to control-transfected cells (**Figure 2C-2E**).

182 We next sought to confirm that the increase in IRS2 protein observed under APC/C  
183 inhibition was due to impaired targeting of IRS2 to the proteasome. To test this, we  
184 arrested RPE1 cells in G<sub>1</sub> using palbociclib and acutely treated them with APC/C inhibitors  
185 and/or a proteasome inhibitor (MG132) for 8 hours. This experiment revealed that APC/C

186 inhibition or proteasome inhibition each resulted in an accumulation of IRS2 (**Figure 2F**).  
187 Notably, co-inhibition of the APC/C and the proteasome did not result in additional  
188 stabilization of IRS2, indicating that the increase in IRS2 we observed under APC/C  
189 inhibition was solely a consequence of its impaired ubiquitination and proteasomal  
190 degradation.

191

### 192 *IRS2 levels and phosphorylation fluctuate in a cell-cycle dependent manner*

193 To test whether IRS2 levels fluctuate during the cell cycle as expected for an  
194 APC/C substrate, we synchronized HeLa cells in early S-phase by double thymidine block  
195 and tracked IRS2 protein abundance leading into mitotic entry by immunoblot (**Figure**  
196 **3A**). As is typical for known APC/C substrates, IRS2 levels correlated with cyclin B1  
197 abundance and APC3 phosphorylation. To assess IRS2 levels at mitotic exit, we  
198 thymidine-nocodazole synchronized HeLa cells, released them into prometaphase, and  
199 tracked IRS2's abundance through mitotic exit (**Figure 3B**). Again, IRS2 protein  
200 abundance correlated with cyclin B1 levels and APC3 phosphorylation. The same  
201 behavior was observed in RPE1 cells that were synchronized in late G<sub>2</sub> by RO3306  
202 treatment (Cdk1 inhibition) and tracked over the course of progression through M-phase  
203 and into G<sub>1</sub> (**Figure 3C**). Based on these data, we conclude that IRS2 protein levels  
204 fluctuate in a cell cycle dependent manner that is consistent with other known APC/C  
205 substrates.

206 In agreement with previous reports of mitotic phosphorylation of IRS2 by Plk1  
207 (Chen et al., 2015), our cell cycle analysis experiments revealed that IRS2 displays a  
208 marked electrophoretic mobility shift consistent with mitotic phosphorylation. This may  
209 owe, at least in part, to Cdk1 activity given that HeLa cells released from a double  
210 thymidine block into Cdk1 inhibitor RO3306 did not display an observable shift in IRS2  
211 mobility as compared to those released into control (DMSO) treatment (**Figure S3**). IRS2  
212 abundance still peaked normally at this time point in the presence of RO3306, suggesting  
213 that the increase in IRS2 abundance was not dependent on Cdk1 activity. Together, these  
214 results support previous findings (Chen et al., 2015) that IRS2 is subject to cell-cycle  
215 dependent phosphorylation and that its abundance peaks in M-phase and falls in early  
216 G<sub>1</sub> in multiple cell lines.

217 *Cdh1 control of IRS2 degradation depends on an IRS2 D-box motif*

218         Based on its SLiMSearch prediction, IRS2 contains four minimal D-box motifs  
219 (RxxL), one extended D-box motif (RxxLxxxxN) and no KEN-box motifs. Of the four  
220 minimal D-box motifs, none bear strong consensus similarity to previously validated D-  
221 box motifs, and one exists in a highly structured region of the protein (Krystkowiak and  
222 Davey, 2017). Because of its high SLiMSearch parameter scores (**Table 1**), we focused  
223 our efforts on determining whether the extended D-box motif located in the C-terminal  
224 third of IRS2 is required for its APC/C<sup>Cdh1</sup> dependent stability. IRS2's extended D-box  
225 (amino acids 972-980 in human IRS2) is highly conserved in placental mammals despite  
226 overall divergence in much of the C-terminus (**Figure 4A**), suggesting that this sequence  
227 likely has a conserved function.

228         To test whether IRS2's full D-box is relevant for its Cdh1-dependent degradation,  
229 we generated a mutant IRS2 construct bearing an R972A mutation ( $\Delta$ D), which was  
230 expected to abrogate its function as a D-box (Glotzer et al., 1991). Using RPE1 cells  
231 stably expressing C-terminally HA-tagged IRS2-WT or IRS2- $\Delta$ D, we found that APC/C  
232 inhibition following G<sub>1</sub> arrest caused accumulation of IRS2-WT but not IRS2- $\Delta$ D (**Figure**  
233 **4B**). The degree of accumulation of the WT protein depended on the dose of APC/C  
234 inhibitors used (**Figure S4A**). We were moreover able to repeat this result in terminally  
235 differentiated C<sub>2</sub>C<sub>12</sub> myotubes that stably expressed doxycycline-inducible, C-terminally  
236 HA-tagged IRS2-WT or IRS2- $\Delta$ D constructs that were treated with APC/C inhibitors  
237 (**Figure 4C**).

238         To further validate the Cdh1-dependence of IRS2's D-box motif, we asked whether  
239 Cdh1 knockdown by siRNA could stabilize the IRS2- $\Delta$ D protein. Using asynchronous  
240 RPE1 cells stably expressing C-terminally HA-tagged IRS2-WT and IRS2- $\Delta$ D, we found  
241 that Cdh1 knockdown by siRNA caused an accumulation of IRS2-WT relative to control-  
242 transfected cells but not IRS2- $\Delta$ D (**Figure 4D**). This result was repeated in HeLa cells  
243 stably expressing N-terminally FLAG-HA-tagged IRS2-WT and IRS2- $\Delta$ D constructs  
244 subject to the same conditions (**Figure 4E**).

245         The stable cell lines described above express tagged IRS2 variants at low levels  
246 comparable to the endogenous protein (**Figure S4B**), making it unlikely that the observed  
247 effects were protein overexpression artifacts. Notably, IRS1 (the other primary adaptor



248 protein for the IGF1R and IR) shares 75% sequence homology with IRS2's N-terminus  
249 and 35% homology with its C-terminus (Sun et al., 1995) but does not share the D-box  
250 motif found in IRS2's C-terminus (**Figure 4F**). In keeping with our hypothesis that Cdh1-  
251 mediated control of IRS2 is D-box dependent, IRS1 levels did not increase in G<sub>1</sub>-arrested  
252 RPE1 cells treated with APC/C inhibitors as measured by either mass spectrometry  
253 (**Figure 4G**) or immunoblot (**Figure 4H**). Furthermore, while it did display a change in  
254 electrophoretic mobility compatible with mitotic phosphorylation, unlike IRS2, it did not  
255 decrease in abundance at mitotic exit in RPE1 cells (**Figure 4I**). Taken together, the  
256 findings described above indicate that APC/C<sup>Cdh1</sup> controls IRS2 levels in manner that is  
257 dependent upon its C-terminal D-box motif.

258

259 *IRS2 is required for normal expression of many proteins involved in mitosis*

260 Many reported APC/C<sup>Cdh1</sup> substrates (including several of those identified in our  
261 initial proteomics screen) are required for normal cell cycle progression. Because  
262 IR/IGF1R transduction promotes a variety of transcriptional programs (Coppes and White,  
263 2012), we hypothesized that IRS2 might promote the expression of proteins involved in  
264 cell cycle control. To investigate this, we generated two IRS2 knockout RPE1 cell lines  
265 using CRISPR/Cas9 (**Figure 5A**), henceforth referred to as  $\Delta$ IRS2-A and  $\Delta$ IRS2-B. Using  
266 these cells, we again employed TMT-coupled quantitative proteomics. The proteomes of  
267 wild-type,  $\Delta$ IRS2-A, and  $\Delta$ IRS2-B cell lines were analyzed in biological triplicate, and  
268 relative abundances were ascertained based on TMT reporter ion signal-to-noise values.  
269 Hierarchical clustering indicated that the proteomes of the two knockout cell lines  
270 analyzed were more similar to each other than either knockout cell line was to wild-type  
271 (**Figure S5A**), indicating that deletion of IRS2 produced similar effects in both cell lines.  
272 In order to exclude aberrancies that may have accrued during the CRISPR process or as  
273 a result of clonal expansion, we focused the scope of our analysis to proteins that  
274 changed significantly ( $p < 0.05$ ) by more than 20% in both IRS2 knockout clones relative  
275 to the WT cell line (**Figures 5B-5C**). We found 239 proteins that decreased by >20% in  
276 both IRS2 knockout lines relative to the wild type line and 300 proteins that increased by  
277 >20% (**Figures 5B-5C, S5B**).

278 We conducted gene enrichment analysis of the proteins that increased (**Figure**  
279 **S5C**) or decreased (**Figure 5D**) by >20% in both knockout cell lines relative to wild type  
280 cells. Of the 239 proteins that were depleted by >20% in both knockout cell lines, we  
281 found a statistical over-representation of proteins participating in metabolic processes  
282 characteristic of IR signal transduction. Notably, we also found an over-representation of  
283 proteins involved in mitotic cell cycle regulation in this subset (**Figure 5D**). This suite of  
284 proteins included regulators of mitotic entry and exit as well as several factors involved in  
285 spindle assembly (**Figure 5E**). Consistent with the fact that strong depletion of most  
286 critical cell cycle regulators renders cells inviable, most of the observed changes in cell  
287 cycle-related genes were relatively modest (**Figure S5D**). Based on these data, we  
288 conclude that IRS2 is important for promoting the expression of a suite of proteins  
289 involved in orchestrating the mitotic cell cycle, and deletion of IRS2 stunts their expression  
290 in RPE1 cells.

291

#### 292 *IRS2 expression promotes a functional spindle assembly checkpoint*

293 Because many of the factors that were depleted in IRS2 knockout cell lines are  
294 known to be involved in regulating spindle assembly and mitotic exit, we asked whether  
295 IRS2 knockout cell lines display phenotypic differences from wild-type cells in terms of  
296 spindle assembly checkpoint function. Using a high content nuclear imaging assay to  
297 measure mitotic fraction based on DAPI staining intensity (Sackton et al., 2014), we asked  
298 whether IRS2 knockout cell lines display mitotic arrest differences compared to wild-type  
299 cells when treated with spindle poisons. Wild-type cells treated with nocodazole (a  
300 microtubule destabilizing agent) arrested in mitosis in a dose-dependent manner,  
301 whereas both IRS2 knockout cell lines displayed depressed mitotic arrest (**Figure 6A**,  
302 **Figure S6A**). This was also true to a lesser extent in the presence of S-trityl-L-cysteine  
303 (STLC), an Eg5 inhibitor (**Figure 6A**).

304 Using time lapse video microscopy, we found that untreated IRS2 knockout cell  
305 lines had no significant alteration in mitotic duration compared to wild-type cells (**Figure**  
306 **S6B**). In contrast, both IRS2 knockout cell lines had a significantly shorter mitotic duration  
307 compared to wild-type cells ( $p < 0.0001$  in both cases) when treated with 300 nM  
308 nocodazole (**Figure 6B**). Importantly, wild-type cells expressing mAG1-geminin (1-101)—

309 an APC/C<sup>Cdc20</sup> substrate that is stabilized by the spindle assembly checkpoint (Clijsters  
310 et al., 2013)— display an accumulation of mAG1 fluorescence early in mitotic arrest,  
311 consistent with checkpoint-mediated blockade of APC/C<sup>Cdc20</sup>. In contrast, both IRS2  
312 knockout cell lines display depressed mAG1 accumulation, consistent with higher  
313 APC/C<sup>Cdc20</sup> activity due to a weakened checkpoint (**Figure 6C**). This phenotype, along  
314 with the shorter mitotic duration and lower mitotic fraction in the presence of spindle  
315 poisons, is consistent with cells bearing a defective mitotic spindle assembly checkpoint.  
316 Based on these data, we conclude that IRS2 promotes a functional spindle assembly  
317 checkpoint in RPE1 cells.

318

## 319 **Discussion**

320 Based on the results of an unbiased proteomic screen, we provide evidence that  
321 IRS2, a critical mediator of IR/IGF1R signaling, is a direct APC/C<sup>Cdh1</sup> substrate. We  
322 demonstrate that IRS2 is stabilized by APC/C inhibition and Cdh1 knockdown in multiple  
323 cell types and that this depends on IRS2's C-terminal D-box motif. In contrast, we find  
324 that IRS1, a closely related IRS2 paralog that lacks a D-box, is not subject to regulation  
325 by the APC/C. Taken together, these results show that APC/C activity directly controls  
326 IRS2 levels in a D-box dependent manner.

327 We identified a high-mobility form of IRS2 that accumulates under APC/C  
328 inhibition, likely corresponding to a difference in phosphorylation given that IRS2 has  
329 ~150 annotated threonine, serine, and tyrosine phosphorylation sites (Hornbeck et al.,  
330 2015). This suggests that IRS2's APC/C-dependent stability could be regulated by  
331 phosphorylation, possibly at sites near or within the D-box, which is an intriguing topic for  
332 future study. Consistent with this, IRS2 phosphorylation is known to impact its stability in  
333 other contexts, including following prolonged exposure to insulin or following mTOR  
334 activation (Coppes and White, 2012). Furthermore, there is a strong precedent for  
335 phospho-regulation of APC/C degrons modulating substrate stability under specific  
336 conditions (Holt, 2012; Mailand and Diffley, 2005; Wang et al., 2001).

337 Many APC/C substrates are involved in cell cycle regulation, and previous studies  
338 have suggested a relationship between IRS2 and cell cycle progression. IRS2 can  
339 stimulate cell cycle entry via Cdk4 activation (Chirivella et al., 2017) and is important for

340 sustaining proliferation in 32D myeloid cells and pancreatic  $\beta$  cells (Folli et al., 2011; Wu  
341 et al., 2009). Based on these findings and our identification of IRS2 as an APC/C  
342 substrate, we further investigated the role of IRS2 in regulating cell division. Proteomic  
343 analyses of RPE1 cells lacking IRS2 reveal lower expression of well-characterized cell  
344 cycle proteins compared to wild-type cells. Because these proteins are involved in critical  
345 processes like cytokinesis, DNA replication, cell cycle transitions, and spindle assembly,  
346 we investigated whether IRS2 knockout cell lines display cell cycle progression defects.  
347 We find that cells lacking IRS2 have an impaired ability to arrest following spindle  
348 assembly checkpoint activation in M-phase, thereby implicating IRS2 in promoting a  
349 functional spindle assembly checkpoint.

350 Despite the well-established importance of sustained IRS2 levels in many tissue  
351 types, little is known about what factors regulate its turnover. While several distinct  
352 ubiquitin ligases control IRS1 stability (Fbxw8, Cbl-b, Fbxo40, SOCS1/3, MG53, and  
353 others) (Nakao et al., 2009; Rui et al., 2002; Shi et al., 2011; Xu et al., 2008; Yi et al.,  
354 2013), only SOCS1/3 have been implicated in the ubiquitin mediated proteolysis of IRS2  
355 (Rui et al., 2002) until now. Thus, our work establishes APC/C<sup>Cdh1</sup> as the first known  
356 ubiquitin ligase that targets IRS2 but not IRS1. Furthermore, our results suggest that  
357 APC/C<sup>Cdh1</sup>-mediated IRS2 degradation is relevant in broad biological contexts since we  
358 were able to demonstrate this mechanism of regulation in multiple cell lines.

359 Over the past several years, a number of connections between growth factor  
360 signaling and APC/C-mediated regulation have emerged. SKIL/SnoN, an APC/C  
361 substrate involved in TGF $\beta$  signaling, implicates APC/C activity in modulating the  
362 expression of TGF $\beta$  target genes (Wan et al., 2001). Another APC/C substrate, CUEDC2,  
363 controls the stability of the progesterone receptor (Zhang et al., 2007). Regarding  
364 IR/IGF1R signaling, connections to APC/C-mediated regulation have been more opaque.  
365 Multiple reports have shown that Cdh1 interacts with PTEN, a phosphatase that  
366 antagonizes signal transduction through the IR pathway by dephosphorylating  
367 phosphoinositide-3,4,5-triphosphate (PIP<sub>3</sub>) (Choi et al., 2014; Song et al., 2011). Others  
368 have demonstrated that components of the mitotic checkpoint complex (which inhibit  
369 APC/C<sup>Cdc20</sup>) potentiates IR signaling via IR endocytosis (Choi et al., 2019; Choi et al.,

2016). Despite these links, there have been no reports of direct APC/C substrates that are involved in IR signaling until now.

Based on the data presented here, we propose a model (**Figure 7**) in which IRS2's APC/C-mediated degradation in G<sub>1</sub> serves to limit IRS2-dependent signaling during G<sub>1</sub>. Upon APC/C inactivation at the G<sub>1</sub>/S boundary, IRS2 is able to accumulate and stimulate signaling required for normal progression through the latter stages of the cell cycle, including the expression of proteins required for mitotic spindle checkpoint function. This model is consistent with previous studies that implicate IRS2 in promoting the expression of cell cycle-related genes, including mitotic cyclins (A and B) in mouse granulosa cells (Lei et al., 2018). Furthermore, IR signal transduction promotes the expression of Plk1 (a mitotic kinase) and CENP-A (a centromere protein) in  $\beta$  cells through a mechanism that appears to depend on IRS2 rather than IRS1 (Folli et al., 2011; Shirakawa et al., 2017).

Our findings suggest that APC/C<sup>Cdh1</sup> modulates IRS2-dependent signaling but not IRS1-dependent pathways. In IRS2-deficient mice with consequent type 2 diabetes, some have attributed the reduced  $\beta$  cell mass to a failure of  $\beta$  cells to re-enter the cell cycle following division (Folli et al., 2011). Our findings that APC/C<sup>Cdh1</sup> inhibition stabilizes IRS2 and that IRS2 promotes the expression of cell cycle regulatory proteins, coupled with data from others showing that IRS2 can stimulate cell cycle entry (Chirivella et al., 2017), suggest that APC/C<sup>Cdh1</sup> inhibition may represent a possible approach for stimulating proliferation in quiescent  $\beta$  cells via the stabilization of IRS2.

## Acknowledgements

We thank the ICCB-Longwood Screening Facility at Harvard Medical School for assistance with high content imaging assays and the Nikon Imaging Facility at Harvard Medical School for assistance with time lapse and fluorescence microscopy. We thank Kyle Copps, Pere Puigserver, and Christine Vogel for feedback on the manuscript. This work was funded by NIH grant 1R35GM127032 to R.W.K.

## Author Contributions

S.M. designed, performed, and analyzed all experiments aimed at identifying new APC/C substrates in RPE1 cells. S.M. performed all experiments characterizing IRS2 as an

401 APC/C substrate. S.M. generated all recombinant cell lines used in this study and the  
402 IRS2 CRISPR knockout cell lines. S.M. characterized mitotic arrest defects in IRS2  
403 CRISPR knockout cell lines using time lapse microscopy and high-content imaging  
404 assays. S.M. prepared all samples for mass spectrometry with assistance from Q.Y.

405  
406 Q.Y. and S.P.G. performed mass spectrometry analysis of G<sub>1</sub> RPE1 cells treated with  
407 APC/C inhibitors and IRS2 CRISPR knockout cell lines. Q.Y. and S.P.G. provided  
408 reagents.

409  
410 R.W.K. assisted with experimental design and data analysis.

411  
412 S.M. and R.W.K. conceived of the project and wrote the manuscript with input from both  
413 other authors.

414  
415 **Declaration of Interests**

416 The authors declare no competing financial interests.

417  
418 **Main Figure Legends**

419 **Figure 1:** *High resolution chemical proteomics reveals proteins whose abundances are*  
420 *APC/C regulated.*

421 (A) Workflow for the chemical proteomics experiment described in this study.  
422 Asynchronous RPE1 cells were arrested in 1  $\mu$ M palbociclib (a Cdk4/6 inhibitor) for  
423 20 hours, at which point they were acutely treated with either DMSO or a combination  
424 of 6  $\mu$ M proTAME + 50  $\mu$ M apcin (referred to as “APC/C inhibitors” or APCi). Cells  
425 were then collected at time 0 ( $t_0$ , the time of drug addition) or 8 hours after drug  
426 addition and were harvested for TMT-based proteomic identification and  
427 quantification. Samples were analyzed in biological triplicate within a 10-plex TMT  
428 label set, with the 10<sup>th</sup> channel used as a bridge.

429 (B) Asynchronous RPE1 cells were treated with either DMSO or 1  $\mu$ M palbociclib for 20  
430 hours. Cells were harvested, and lysates were analyzed by immunoblot for the  
431 indicated proteins.

- 432 (C) Previously reported APC/C substrates that were identified in this study are plotted with  
433 their observed fold change in the APC/C inhibitor treated sample (APCi) relative to  
434 the DMSO treated sample. Error bars represent the standard deviation (SD) between  
435 the three biological replicates measured by MS. Asterisks indicate an abundance  
436 increase over control that is statistically significant ( \* :  $p < 0.05$  ; \*\* :  $p < 0.01$  ; \*\*\* :  $p$   
437  $< 0.001$  ; \*\*\*\* :  $p < 0.0001$ )
- 438 (D) Volcano plot highlighting all published APC/C substrates identified in this study (blue)  
439 as well as proteins that (1) contain a high probability D- and/or KEN-box (D-box =  
440 green, KEN-box = pink, D- and KEN-boxes = purple), (2) increase  $\geq 1.147$ -fold under  
441 APC inhibition, (3) were identified by  $>1$  peptide, and (4) have a p-value  $< 0.05$ .

442

443 **Figure 2: IRS2 levels are controlled by Cdh1 in a proteasome-dependent manner**

- 444 (A) Cells were treated identically to what is described in **Figure 1A**, and IRS2 abundance  
445 was measured by immunoblot.
- 446 (B) C<sub>2</sub>C<sub>12</sub> myoblasts (Day 0) were induced to differentiate through serum withdrawal and  
447 supplementation with insulin, transferrin, and selenium (ITS). After three days of  
448 differentiation, myotubes were acutely treated with either DMSO or APC/C inhibitors  
449 (of 6  $\mu$ M proTAME + 50  $\mu$ M apcin). After eight hours of drug treatment, myotubes were  
450 collected and IRS2 levels from all samples were analyzed by immunoblotting.
- 451 (C)–(E) Asynchronous RPE1 (C), C<sub>2</sub>C<sub>12</sub> (D), and HeLa (E) cells were transfected with  
452 either a control or Cdh1-directed siRNA for 24 hours. siRNAs were washed out of cell  
453 culture media, and cells were allowed to grow for an additional 24 hours prior to  
454 collection and analysis of IRS2 and Cdh1 levels in lysate by immunoblot.
- 455 (F) RPE1 cells were arrested in G<sub>1</sub> with 1  $\mu$ M palbociclib for 20 hours. Following G<sub>1</sub>  
456 arrest, cells were treated with DMSO, APC/C inhibitors (6  $\mu$ M proTAME + 50  $\mu$ M  
457 apcin), MG132 (10  $\mu$ M), or a combination of APC/C inhibitors and MG132 for an  
458 additional 8 hours. Cells were harvested, and lysates were analyzed by immunoblot  
459 for IRS2 abundance.

460

461 **Figure 3: IRS2 levels and phosphorylation fluctuate in a cell-cycle dependent manner**

462 (A) HeLa cells were synchronized by double thymidine block and released into S-phase.  
463 Time points were taken every two hours for 14 hours. Lysates were harvested and  
464 analyzed by immunoblotting for IRS2 and cell cycle markers (APC3 phosphorylation  
465 and cyclin B1).

466 (B) HeLa cells were synchronized by thymidine-nocodazole block and released into  
467 prometaphase. Mitotic cells were collected by mitotic shake-off and re-plated. Time  
468 points were taken every two hours as cells exited M-phase. Lysates were harvested  
469 and analyzed by immunoblotting for IRS2 and cell cycle markers (APC3  
470 phosphorylation and cyclin B1).

471 (C) RPE1 cells were synchronized in prometaphase by 7.5  $\mu$ M RO3306 treatment. After  
472 18 hours, cells were switched to fresh media and were allowed to enter mitosis (~35  
473 minutes following drug removal). At mitotic entry, cells were collected by mitotic shake-  
474 off and were re-plated (0 hr). Time points were taken as cells exited M-phase and  
475 entered G<sub>1</sub>. Lysates were harvested and analyzed by immunoblotting for IRS2 and  
476 cell cycle markers (APC3 phosphorylation and cyclin B1).

477

478 **Figure 4:** *Cdh1's ability to control IRS2 levels depends on a C-terminal D-box motif*

479 (A) (*top*) Schematic depicting IRS2's protein domain structure. PH = pleckstrin homology  
480 domain, PTB = phosphotyrosine binding domain, KRLB = kinase regulatory-loop  
481 binding region. IRS2's C-terminal full D-box motif is highlighted in red. (*bottom*)  
482 Comparison of IRS2's D-box conservation among placental mammals.

483 (B) RPE1 cells stably expressing lentivirus-derived, doxycycline-inducible, C-terminally  
484 HA-tagged IRS2 constructs were arrested in G<sub>1</sub> with 1  $\mu$ M palbociclib for 20 hours.  
485 Following arrest, samples were either collected or DMSO or APC inhibitors (6  $\mu$ M  
486 proTAME + 50  $\mu$ M apcin) were added for an additional 8 hours. Quantification of  
487 immunoblots shown at right: HA levels were normalized to a loading control and are  
488 plotted relative to DMSO levels. Error bars = mean  $\pm$  SEM. \* :  $p=0.0187$ ; ns :  $p=0.816$

489 (C) C<sub>2</sub>C<sub>12</sub> myoblasts stably expressing lentivirus-derived, doxycycline-inducible, C-  
490 terminally HA-tagged IRS2 constructs were grown to confluence and switched to low  
491 serum media supplemented with ITS (differentiation media, DM) and doxycycline.  
492 Cells were allowed to differentiate into myotubes for three days (with media



493 refreshment every 24 hours), at which point (0 hr) either DMSO or APC/C inhibitors (6  
494  $\mu\text{M}$  proTAME + 50  $\mu\text{M}$  apcin) for an additional 8 hours in the presence of doxycycline.  
495 Quantification of immunoblots shown at right: HA levels were normalized to a loading  
496 control and are plotted relative to DMSO levels. Error bars = mean  $\pm$  SEM. \* :  
497  $p=0.0118$ ; ns :  $p=0.910$ .

498 (D) Asynchronous RPE1 cells stably expressing lentivirus-derived, doxycycline-inducible  
499 C-terminally HA-tagged IRS2 constructs were transfected with a non-targeting  
500 (control) siRNA or an siRNA directed against Cdh1 for 24 hours. Quantification of  
501 immunoblots shown at right: HA levels were normalized to a loading control and are  
502 plotted relative to DMSO levels. Error bars = mean  $\pm$  SEM. \* :  $p=0.0132$ ; ns :  $p=0.963$ .

503 (E) Asynchronous HeLa cells stably expressing lentivirus-derived, N-terminally FLAG-HA  
504 tagged IRS2 constructs were transfected with a non-targeting (control) siRNA or an  
505 siRNA directed against Cdh1 for 24 hours. Quantification of immunoblots shown at  
506 right: HA levels were normalized to a loading control and are plotted relative to DMSO  
507 levels. Error bars = mean  $\pm$  SEM. \* :  $p=0.0131$ ; ns :  $p=0.803$ .

508 (F) Comparison of the Hs IRS2 D-box sequence with the aligned area on Hs IRS1.

509 (G) MS-quantified IRS1 and IRS2 abundance in G<sub>1</sub> APC inhibitor proteomics. IRS1  
510 abundance was quantified based on 5 peptides (4 unique) in 3 biological replicates;  
511 IRS2 was quantified based on 3 peptides (all unique) in 3 biological replicates.

512 (H) RPE1 cells were subject to the same conditions described in Figure 1A, and cell  
513 lysates were analyzed by immunoblotting for IRS1 abundance

514 (I) RPE1 cells were synchronized in late G<sub>2</sub> with 7.5  $\mu\text{M}$  RO3306 for 18 hours. Cells  
515 were released into fresh media and allowed to enter mitosis (~35 min post-drug  
516 removal) and were collected by mitotic shake-off. Mitotic cells were re-plated and  
517 collected at the indicated time points. Cell lysates were analyzed by immunoblotting  
518 for IRS1 abundance.

519

520 **Figure 5:** *IRS2 knockout cell lines are defective in mitotic cell cycle-related protein*  
521 *expression.*

522 (A) WT,  $\Delta\text{IRS2-1}$ , and  $\Delta\text{IRS2-2}$  cell line lysates were analyzed for IRS2 expression by  
523 immunoblotting.

- 524 (B-C) Volcano plots comparing proteomes of  $\Delta$ IRS2 cell lines with WT cell line. Proteins  
525 that significantly decrease > 20% (p-value<0.05) in both cell lines compared to wild-  
526 type are shown in purple; proteins that significantly increase > 20% (p-value<0.05) in  
527 both cell lines compared to WT are shown in green.
- 528 (D) Gene ontology (GO) term enrichment of proteins that decrease in both  $\Delta$ IRS2 cell lines  
529 relative to WT cells.
- 530 (E) Heat map depicting cell cycle-related protein abundance changes between  $\Delta$ IRS2 cell  
531 lines and WT cells.

532

533 **Figure 6:** *IRS2 expression promotes a functional spindle assembly checkpoint.*

- 534 (A) Mitotic fractional analysis for RPE1 wild type (WT) and IRS2 KO cell lines treated with  
535 the indicated doses of nocodazole and S-trityl L-cysteine (STLC) for 18 hours. Mitotic  
536 fraction measurements were made using a high content fixed cell imaging assay  
537 based on DAPI intensity of stained nuclei. Error bars = mean  $\pm$  SD.
- 538 (B) Asynchronous RPE1 wild type (WT) or IRS2 KO cell lines were treated with 300 nM  
539 nocodazole and imaged every five minutes by widefield time lapse microscopy for 36  
540 hours. Each point represents an individual cell's mitotic duration, measured as the  
541 time from nuclear envelope breakdown (NEB) to division, slippage, or cell death. Error  
542 bars = mean  $\pm$  SD. *p*-values were calculated by one-way ANOVA. \*\*\*\* = *p*<0.0001. ns  
543 = not statistically significant.
- 544 (C) Asynchronous RPE1 wild type (WT) or IRS2 KO cell lines expressing mAG1-  
545 geminin(1-110) were treated as in (C). mAG1 fluorescence intensity was measured  
546 from nuclear envelope breakdown (NEB) until division, slippage, or cell death (n=10  
547 for all three cell lines). Error bars = mean  $\pm$  SEM. Fluorescence intensity was  
548 background subtracted and normalized to intensity at NEB.

549

550 **Figure 7:** Model for IRS2's role in cell cycle control. IRS2 is targeted for proteasomal  
551 degradation by APC/C<sup>Cdh1</sup> during G<sub>1</sub>. When APC/C is inactivated at the G<sub>1</sub>/S boundary,  
552 IRS2 protein accumulates, potentially allowing it to stimulate the expression of cell cycle-  
553 related proteins either through IR-mediated action (Shirakawa et al., 2017) or through  
554 another receptor tyrosine kinase. Some of the proteins that are expressed through this

555 pathway may be required for a robust spindle assembly checkpoint, which directly inhibits  
 556 APC/C<sup>Cdc20</sup> during M-phase.

557

558 **Tables**

559 **Table 1:** 26 proteins containing high-probability D- and KEN-boxes as identified from G<sub>1</sub>  
 560 APC/C inhibitor proteomics.

| Gene Symbol         | Fold Change | KEN box | D box | Similarity score(s) <sup>a</sup> | Consensus similarity <sup>b</sup> | Disorder Score <sup>c</sup> | Citation <sup>d</sup>         |
|---------------------|-------------|---------|-------|----------------------------------|-----------------------------------|-----------------------------|-------------------------------|
| TK1                 | 3.6         | Y       |       | 0.97                             | High                              | 0.53                        | (Ke et al., 2005)             |
| CKAP2               | 3.2         | Y       | Y     | 0.95 ; 0.81                      | High ; Medium                     | 0.62 ; 0.49                 | (Seki and Fang, 2007)         |
| KIF11               | 2.4         | Y       | Y     | 0.97 ; 0.84                      | High ; High                       | 0.57 ; 0.52                 | (Eguren et al., 2014)         |
| GMNN <sup>e</sup>   | 2.2         | Y       | Y     | 0.80 ; 0.81                      | Low ; Medium                      | 0.61 ; 0.66                 | (McGarry and Kirschner, 1998) |
| TACC3               | 1.9         | Y (2)   |       | 0.94/0.90                        | High/High                         | 0.54/0.49                   | (Jeng et al., 2009)           |
| TOP2A               | 1.8         | Y       |       | 0.86                             | High                              | 0.44                        | (Eguren et al., 2014)         |
| <b>MKI67</b>        | 1.5         | Y (2)   |       | 0.89/0.86                        | High/High                         | 0.45/0.48                   |                               |
| CUEDC2              | 1.4         | Y       |       | 0.99                             | High                              | 0.71                        | (Zhang et al., 2013)          |
| <b>IRS2</b>         | 1.3         |         | Y     | 0.87                             | High                              | 0.68                        |                               |
| <b>GPBP1</b>        | 1.3         | Y       |       | 0.81                             | Medium                            | 0.61                        |                               |
| BUB1B               | 1.2         | Y (2)   | Y (2) | 0.92/0.85 ; 0.83/0.86            | High/Medium ; High/High           | 0.47/0.64 ; 0.47/0.49       | (Choi et al., 2009)           |
| <b>UHRF2</b>        | 1.2         | Y       |       | 0.88                             | High                              | 0.61                        |                               |
| PBXIP1              | 1.2         |         | Y     | 0.83                             | Medium                            | 0.42                        | (Khumukcham et al., 2019)     |
| <b>DCBLD1</b>       | 1.2         |         | Y     | 0.86                             | High                              | 0.56                        |                               |
| KIF23               | 1.2         | Y       |       | 0.87                             | High                              | 0.45                        | (Singh et al., 2014)          |
| <b>ULK1</b>         | 1.2         |         | Y     | 0.85                             | High                              | 0.58                        |                               |
| <b>NAA38</b>        | 1.2         |         | Y     | 0.82                             | Medium                            | 0.44                        |                               |
| <b>LRP10</b>        | 1.2         |         | Y     | 0.82                             | Medium                            | 0.49                        |                               |
| <b>PNPLA8</b>       | 1.2         | Y       |       | 0.92                             | High                              | 0.61                        |                               |
| <b>CEP120</b>       | 1.2         |         | Y     | 0.84                             | High                              | 0.42                        |                               |
| DIAPH3 <sup>f</sup> | 1.2         |         | Y     | 0.84                             | High                              | 0.56                        | (DeWard and Alberts, 2009)    |
| <b>KDM2A</b>        | 1.2         | Y       |       | 0.94                             | High                              | 0.66                        |                               |
| <b>PRPF38B</b>      | 1.2         | Y       |       | 0.92                             | High                              | 0.44                        |                               |
| DLGAP5              | 1.2         | Y       |       | 0.89                             | High                              | 0.6                         | (Song and Rape, 2010)         |
| KDM3A               | 1.2         | Y       | Y     | 0.95 ; 0.81                      | High ; Medium                     | 0.59 ; 0.48                 |                               |
| <b>ANKRD11</b>      | 1.2         |         | Y     | 0.86                             | High                              | 0.53                        |                               |

561 Features of the putative degron(s) found in each protein are annotated, including (a) the  
562 SLiMSearch similarity score to other validated degrons, (b) the similarity of the  
563 surrounding consensus sequence to other validated degrons, (c) the disorder score for  
564 the region of the protein in which the degron is located, and (d) the citation of the  
565 publication that reports the protein as an APC/C substrate, where applicable. (e) We  
566 cannot delineate whether the geminin peptides identified here derive from the FUCCI  
567 reporter or the endogenous protein. (f) While DIAPH3/mDia2 has been shown to be  
568 ubiquitinated in a cell cycle dependent manner and was suggested as an APC/C  
569 substrate, there is no direct cell-based or biochemical evidence for this. Previously  
570 reported substrates are shown in bold.

571

## 572 **STAR Methods**

### 573 ***Cell Culture and Synchronization***

574 All cell lines used in this work (HeLa, C<sub>2</sub>C<sub>12</sub>, hTERT-RPE1-FUCCI, HEK293T) were  
575 cultured in a humidified incubator at 37°C in the presence of 5% CO<sub>2</sub>. HeLa, hTERT-  
576 RPE1 and C<sub>2</sub>C<sub>12</sub> cells were obtained from American Type Culture Collection (ATCC), and  
577 hTERT-RPE1 cells were modified with FUCCI constructs(Sakaue-Sawano et al., 2008)  
578 with the permission of the RIKEN Institute. HeLa cells were grown in DMEM with 10%  
579 FBS. Proliferating C<sub>2</sub>C<sub>12</sub> myoblasts were grown in DMEM with 15% FBS, whereas  
580 differentiated myotubes were cultured in differentiation media, consisting of DMEM with  
581 2% horse serum and 1x insulin, transferrin, selenium (ITS) Premix Universal Culture  
582 Supplement (Corning, 354350). hTERT-RPE1-FUCCI cells were grown in DMEM/F12  
583 with 10% FBS supplemented with 0.01 mg/ml hygromycin B (Corning, 30-240-CR).  
584 HEK293T cells used for lentivirus generation were a gift from Wade Harper and were  
585 cultured in DMEM with 10% FBS. All cell lines tested were negative for mycoplasma  
586 contamination (Lonza LT07-218).

587

588 HeLa cells were synchronized by double thymidine block by treating with 2 mM thymidine  
589 for 18 hours, releasing for 8 hours, and re-treating with 2 mM thymidine for 19 hours.  
590 HeLa cells synchronized by thymidine-nocodazole block were treated with 2 mM  
591 thymidine for 20 hours, released for 8 hours, then treated with 300-330 nM nocodazole

592 for 15 hours. Mitotic cells were collected by shake-off and re-plated in drug-free media for  
593 cell cycle time course experiments.

594

595 RPE1 cells were synchronized by RO3306 treatment by treating with 7.5  $\mu$ M RO3306 for  
596 18 hours before releasing into fresh media for 30-40 minutes, after which cells were  
597 collected by mitotic shake-off and re-plated for cell cycle time course experiments. For G<sub>1</sub>  
598 arrest experiments, RPE1 cells were treated with 1  $\mu$ M palbociclib for 20 hours.

599

600 To differentiate C<sub>2</sub>C<sub>12</sub> myoblasts into myotubes, cells were grown to confluence and  
601 washed 2x in DMEM with 2% horse serum before switching to differentiation media. Cells  
602 were incubated for 72 hours, with media changes every 24-36 hours. Differentiation into  
603 myotubes was confirmed visually as well as by immunoblotting for MyoD, a myogenic  
604 marker.

605

### 606 ***Immunoblotting***

607 Cell extracts were prepared in lysis buffer (10 mM Tris HCl pH 7.4, 100 mM NaCl, 1 mM  
608 EDTA, 1 mM EGTA, 1 mM NaF, 1 mM PMSF, 20 mM Na<sub>4</sub>P<sub>2</sub>O<sub>7</sub>, 2 mM NA<sub>3</sub>VO<sub>4</sub>, 1% Triton  
609 X-100, 10% glycerol, 0.1% SDS, and 0.5% deoxycholate) supplemented with Pierce  
610 protease inhibitor tablets (Thermo Fisher Scientific, A32963) and Pierce phosphatase  
611 inhibitor tablets (Thermo Fisher Scientific, A32957). Pellets were incubated in lysis buffer  
612 on ice for 30 minutes with vortexing and were centrifuged at 13,000rpm for 10 minutes to  
613 clear the lysate. Protein concentrations were determined using a bicinchoninic acid (BCA)  
614 assay (Thermo Fisher Scientific, 23225). Supernatants were re-suspended in NuPAGE  
615 LDS sample buffer (Thermo Fisher Scientific, NP0008) supplemented with 100 mM  
616 dithiothreitol (DTT) and boiled at 100°C for 5 minutes. Equal masses of lysates were  
617 separated by SDS-PAGE using either 4-12% Bis Tris gels or 3-8% Tris acetate gels  
618 (Thermo Fisher Scientific). All IRS2 immunoblots were separated on 3-8% Tris acetate  
619 gels with the exception of those shown in **Figures 5A** and **S4B**, which were separated on  
620 4-12% Bis Tris gels. Proteins were transferred to polyvinylidene difluoride (PVDF)  
621 membranes (Thermo Fisher Scientific, 88518).

622

623 Membranes were blocked in 5% non-fat dry milk in Tris-buffered saline with 0.1% Tween  
624 (TBS-T) before incubating with primary antibodies overnight at 4°C with agitation.  
625 Membranes were probed with secondary antibodies dissolved in 5% milk in TBS-T for 1-  
626 2 hours at room temperature before developing with an Amersham 600RGB imaging  
627 system. Quantification of immunoblots was done using ImageJ (Schneider et al., 2012).

628

### 629 ***Antibodies***

630 The following commercially available primary antibodies were used for immunoblotting:  
631 anti-IRS2 (Cell Signaling Technologies, 4502) 1:750; anti-Cdh1/Fzr1 (Sigma Aldrich,  
632 CC43) 1:500; anti-APC3 (BD Transduction Laboratories, 610455) 1:500; anti-cyclin B1  
633 (Santa Cruz Biotechnology, sc-752) 1:500; anti-Cdc20 (Santa Cruz Biotechnology, sc-  
634 8358) 1:500; anti-HA-peroxidase (Sigma Aldrich), 1:1500; anti-cyclin A2 (Santa Cruz  
635 Biotechnology, sc-596) 1:500; anti-IRS1 (Cell Signaling Technologies, 2382) 1:750; anti-  
636 MyoD1 (Cell Signaling Technologies, 13812) 1:750; anti-GAPDH (Abcam, ab8245)  
637 1:2000; anti- $\alpha$  tubulin (Abcam, ab7291 and Santa Cruz Biotechnology, sc-8035) 1:1000  
638 for both; anti-vinculin (Santa Cruz Biotechnology, sc-73614) 1:2000. Secondary  
639 antibodies used: anti-rabbit IgG-HRP (GE Healthcare, NA934) and anti-mouse IgG- HRP  
640 (GE Healthcare, NA931V), both at 1:3000 dilutions.

641

### 642 ***Compounds***

643 The following chemicals were used: palbociclib (LC Laboratories, P-7722), proTAME  
644 (Boston Biochem, I-440), MG132 (474790, Calbiochem), S-trityl L-cysteine (STLC, Alfa  
645 Aesar, L14384), thymidine (Sigma Aldrich, T9250), nocodazole (Sigma Aldrich, 31430-  
646 18-9), RO3306 (AdipoGen Life Sciences, AGCR13515M), doxycycline hyclate (Sigma  
647 Aldrich, D9891). Apcin was custom synthesized by Sundia MediTech Company (Lot  
648 #A0218-10069-031) using methods described previously (Sackton et al., 2014). All  
649 compounds were dissolved in dimethyl sulfoxide (DMSO), with the exception of thymidine  
650 and doxycycline, which were dissolved in Dulbecco's phosphate buffered saline (DPBS,  
651 Corning, 21-030-CV). Dissolved compounds were stored at -20°C prior to use.

652

### 653 ***CRISPR/Cas9 mediated gene editing***

654 A TrueGuide crRNA directed against exon 1 of Hs IRS2's coding region (target DNA  
655 sequence: 5'- TCG AGA GCG ATC ACC CGT TT -3', Assay ID number:  
656 CRISPR850215\_CR, Thermo Fisher Scientific) was annealed to the TrueGuide tracrRNA  
657 (Thermo Fisher Scientific, A35507) according to manufacturer protocol. hTERT RPE1-  
658 FUCCI cells were co-transfected with TrueCut Cas9 protein v2 (Thermo Fisher Scientific,  
659 A36496) and the annealed tracrRNA:crRNA complex using the Lipofectamine  
660 CRISPRMAX Cas9 Transfection reagent (Thermo Fisher Scientific, CMAX00003)  
661 according to manufacturer protocol. Transfected cells were incubated for two days before  
662 switching to fresh media and expanding. Single cell clones were isolated using the limiting  
663 dilution method in a 96-well format, and clonal cell lines were expanded before screening  
664 for knockouts by immunoblotting.

665

### 666 ***Site directed mutagenesis***

667 R777-E111 Hs.IRS2 and R777-E111 Hs.IRS2-nostop were gifts from Dominic Esposito  
668 (Addgene plasmid #70395 and #70396, respectively). Both of these plasmids encode  
669 codon optimized sequences for IRS2, with and without a stop codon respectively. R972A  
670 mutations were introduced into the aforementioned IRS2 clones using the Q5 Site-  
671 Directed Mutagenesis Kit (New England BioLabs) with the primers 5' - AGA TTA TAT  
672 GAA TAA GTC CAC TGT CAG ATT ATA TG - 3' and 5' - GAC AGT GGA CTT GCC TGG  
673 CGA GAG TCT GAA CT - 3' according to the manufacturer's protocol. For N-terminally  
674 FLAG-HA-tagged constructs, the insert from R77-E111 Hs.IRS2 (WT or  $\Delta$ D) was cloned  
675 into the pHAGE-FLAG-HA-NTAP vector (a gift from Wade Harper) using the Gateway LR  
676 Clonase II system (Invitrogen). For doxycycline-inducible, C-terminally HA-tagged  
677 constructs, the insert from R77-E111 Hs.IRS2-nostop (WT or  $\Delta$ D) was cloned into  
678 pINDUCER20 (a gift from Stephen Elledge, Addgene plasmid #44012) using the Gateway  
679 LR Clonase II system (Invitrogen). The  $\Delta$ D mutation was verified both before and after  
680 Gateway cloning by Sanger sequencing.

681

### 682 ***Lentivirus construction***

683 To construct lentiviruses, HEK293T cells were co-transfected with pPAX2, pMD2, and  
684 either pINDUCER-20-IRS2 or pHAGE-FLAG-HA-NTAP-IRS2 in a 4:2:1 DNA ratio using

685 Lipofectamine 3000 (Invitrogen, L3000001) according to manufacturer's instructions.  
686 pPAX2 and pMD2 were gifts from Wade Harper. 24 hours after transfection, HEK293T  
687 cells were switched to fresh media (DMEM + 10% FBS). 48 hours after transfection  
688 lentiviruses were harvested by clearing debris by centrifugation at 960xg for 5 minutes  
689 and filtering through 0.45  $\mu\text{m}$  SFCA filters. Lentiviruses were either used immediately or  
690 flash frozen in liquid nitrogen and stored at  $-80^{\circ}\text{C}$  for later use.

691

### 692 ***Stable cell line construction***

693 To generate stable cell lines, plated HeLa, RPE1, or C<sub>2</sub>C<sub>12</sub> cells were incubated with  
694 lentiviruses and 2  $\mu\text{g}/\text{ml}$  protamine sulfate. 24 hours after viral infection, cells were  
695 switched to fresh media. 48 hours after viral infection, antibiotics were introduced. For  
696 lentiviruses derived from pINDUCER20, geneticin (Invitrogen, 10131027) was used at a  
697 concentration of 750  $\mu\text{g}/\text{ml}$  for both RPE1 and C<sub>2</sub>C<sub>12</sub> for 6-7 days. For lentiviruses derived  
698 from pHAGE-FLAG-HA-NTAP, puromycin (Sigma Aldrich, P8833) was used at a  
699 concentration of 0.5  $\mu\text{g}/\text{ml}$  for 3 days. Antibiotic-selected populations of cells were  
700 expanded and used for further experiments without clonal selection.

701

### 702 ***Small interfering RNAs (siRNAs)***

703 Cells were transfected using RNAiMax (Invitrogen, 13778100) according to  
704 manufacturer's instructions with the following siRNAs: siGENOME Non-Targeting Control  
705 siRNA #5 (D-001210-05, Dharmacon); ON-TARGETplus Human FZR1 siRNA (J-015377-  
706 08, Dharmacon), 25 nM; SMARTpool ON-TARGETplus Mouse Fzr1 siRNA (L-065289-  
707 01-0005), 25 nM. Cells were treated with siRNAs for 24 hours for all experiments. For  
708 experiments involving subsequent compound treatment, cells were switched to fresh  
709 media prior to the addition of compounds.

710

### 711 ***Plasmid transfection***

712 C<sub>2</sub>C<sub>12</sub> myoblasts were transfected with a plasmid containing the N-terminal 88 amino  
713 acids of human cyclin B1 fused to EGFP using Lipofectamine 3000 (Invitrogen,  
714 L3000001) with the P3000 reagent according to manufacturer's instructions. Growth



715 media was refreshed to remove transfection reagents 24 hours post-transfection, and  
716 cells were switched to differentiation media for an additional 3 days.

717

### 718 ***Time lapse and fluorescence microscopy***

719 Cells were plated in a 24-well coverslip-bottom plate (Greiner BioOne, 662892). After 24  
720 hours, cells were treated with the indicated compounds and were imaged immediately  
721 afterwards. Plates were inserted into a covered cage microscope incubator (Okolab) with  
722 temperature and humidity control at 37°C and 5% CO<sub>2</sub> and mounted on a motorized  
723 microscope stage (Prior ProScan III). All images were collected on a Nikon Ti motorized  
724 inverted microscope equipped with a 20x/0.75 NA Plan Apo objective lens and the Perfect  
725 Focus system. mCherry fluorescence was excited with a Lumencor Spectra-X using a  
726 555/25 excitation filter and a 605/52 emission filter (Chroma). mAG1 fluorescence was  
727 excited using a 490/20 excitation filter and a 525/36 emission filter (Chroma). Both  
728 configurations used a Sedat Quad dichroic (Chroma). Images were acquired with a  
729 Hamamatsu Orca-R2 or Hamamatsu Flash 4.0 V2 controlled with Nikon Elements image  
730 acquisition software. Three fields of view were collected per condition, and phase contrast  
731 and/or fluorescence images were captured at 5- to 8-minute intervals (depending upon  
732 the experiment) for 24-48 hours.

733

734 Videos were analyzed using ImageJ. Mitotic duration was defined as the time from  
735 nuclear envelope breakdown (NEB) until division, death (cytoplasmic blebbing), or mitotic  
736 slippage. mAG1 and mCherry intensities were quantified manually by measuring the  
737 maximum intensity of signal for each cell in a given frame across multiple time points. For  
738 experiments analyzing fluorescence intensity during G<sub>1</sub> arrest, measurements were made  
739 for all cells in a frame for each time point.

740

### 741 ***TMT mass spectrometry sample preparation***

742 Cells were cultured as described in biological triplicate. Cells pellets were re-suspended  
743 in urea lysis buffer: 8M urea, 200 mM EPPS pH 8.0, Pierce protease inhibitor tablets  
744 (Thermo Fisher Scientific, A32963), and Pierce phosphatase inhibitor tablets (Thermo  
745 Fisher Scientific, A32957). Lysates were passed through a 21-gauge needle 20 times,

746 and protein concentrations were measured by BCA assay (Thermo Fisher Scientific). 100  
747  $\mu$ g of protein were reduced with 5 mM tris-2-carboxyethyl-phosphine (TCEP) at room  
748 temperature for 15 minutes, alkylated with 10 mM iodoacetamide at room temperature for  
749 30 minutes in the dark, and were further reduced with 15 mM DTT for 15 minutes at room  
750 temperature. Proteins were precipitated using a methanol/chloroform extraction. Pelleted  
751 proteins were resuspended in 100  $\mu$ L 200 mM EPPS, pH 8.0. LysC (Wako, 125-05061)  
752 was added at a 1:50 enzyme:protein ratio, and samples were incubated overnight at room  
753 temperature with agitation. Following overnight incubation, trypsin (Promega, V5111) was  
754 added at a 1:100 enzyme:protein ratio, and samples were incubated for an additional 6  
755 hours at 37°C. Tryptic digestion was halted by the addition of acetonitrile (ACN). Tandem  
756 mass tag (TMT) isobaric reagents (Thermo Fisher Scientific, 90406) were dissolved in  
757 anhydrous ACN to a final concentration of 20 mg/mL, of which a unique TMT label was  
758 added at a 2:1 label:peptide ratio. Peptides were incubated at room temperature for one  
759 hour with vortexing after 30 minutes. TMT labeling reactions were quenched by the  
760 addition of 10  $\mu$ L of 5% hydroxylamine. Equal amounts of each sample were combined  
761 at a 1:1 ratio across all channels and lyophilized by vacuum centrifugation. Samples were  
762 re-suspended in 1% formic acid (FA)/99% water and were desalted using a 50 mg 1cc  
763 SepPak C18 cartridge (Waters, WAT054955) under vacuum. Peptides were eluted with  
764 70% ACN/1% FA and lyophilized to dryness by vacuum centrifugation. The combined  
765 peptides were fractionated with basic pH reversed-phase (BPRP) HPLC, collected in a  
766 96-well format and consolidated to a final of 24 fractions, out of which only alternating  
767 fractions (a total of 12) were analyzed (Navarrete-Perea et al., 2018). Each fraction was  
768 desalted via StageTip, lyophilized to dryness by vacuum centrifugation, and reconstituted  
769 in 5% ACN/5% FA for LC-MS/MS processing.

770

### 771 ***TMT mass spectrometry analysis***

772 Data for the G<sub>1</sub> APC inhibition experiment were collected on an Orbitrap Fusion mass  
773 spectrometer coupled to a Proxeon EASY-nLC 1000 liquid chromatography (LC) pump  
774 (Thermo Fisher Scientific), whereas data for IRS2 knockout cell line analysis were  
775 collected on an Orbitrap Fusion Lumos mass spectrometer coupled to a Proxeon EASY-  
776 nLC 1200 liquid chromatography (LC) pump. The 100  $\mu$ m capillary column was packed

777 with 30 cm of Accucore 150 resin (2.6  $\mu\text{m}$ , 150 $\text{\AA}$ ; Thermo Fisher Scientific). Mobile  
778 phases were 5% ACN, 0.125% FA (Buffer A) and 95% ACN, 0.125% FA (Buffer B).  
779 Peptides from G<sub>1</sub> APC inhibition experiment were separated using a 2.5 h gradient from  
780 4% to 26% Buffer B and analyzed with a SPS-MS3 method (McAlister et al., 2014).  
781 Peptides from IRS2 knockout cell line analysis were separated using a 2 h gradient from  
782 4% to 30% Buffer B and analyzed with a real-time search strategy (Erickson et al., 2019;  
783 Schweppe et al., 2019).

784  
785 Raw data were converted to mzXML format using a modified version of RawFileReader  
786 and searched against a human protein target-decoy database. Searches were performed  
787 with a 50 ppm precursor mass tolerance, 0.9 Da fragment mass tolerance, trypsin digest  
788 with up to 2 missed cleavages. Allowed modifications include cysteine  
789 carboxyamidomethylation (+57.02146), static TMT on lysine and peptide N-termini  
790 (+229.16293) and up to 3 variable methionine oxidation (+15.99491). Peptide spectral  
791 matches were filtered with a linear discriminant analysis (LDA) method to a 1% FDR  
792 (Huttlin et al., 2010) and a protein-level FDR of 1% was also implemented (Savitski et al.,  
793 2015). For peptide quantification, we extracted the TMT signal-to-noise and column  
794 normalized each channel to correct for equal protein loading. Peptide spectral matches  
795 with summed signal-to-noise less than 100 were excluded from final result. Lastly, each  
796 protein was scaled such that the summed signal-to-noise for that protein across all  
797 channels equals 100, thereby generating a relative abundance (RA) measurement.

798  
799 ***High content mitotic fraction assay***  
800 Asynchronous hTERT RPE1-FUCCI wild-type or IRS2 KO cell lines were plated in a  
801 black, clear-bottom 96-well plate (Corning, 3606). Plates were sealed with breathable  
802 white rayon sealing tape (Nunc, 241205) to prevent evaporation following plating and  
803 during all subsequent incubations. In experiments involving RNAi, cells were treated with  
804 siRNAs for 24 hours. Cells were switched to fresh media, and compounds were added at  
805 the indicated concentrations for an additional 18 hours. Following compound treatment,  
806 cells were fixed and stained directly without additional washing steps (to avoid the loss of  
807 loosely attached mitotic cells) with 10% formalin, 0.33  $\mu\text{g}/\text{mL}$  Hoechst 33342, and 0.1%

808 Triton X-100 in DPBS. Plates were sealed with aluminum tape (Nunc, 276014) and were  
809 incubated for 45 minutes room temperature in the dark before imaging. All experimental  
810 conditions were represented in triplicate on the same plate. Plates were imaged using an  
811 ImageXpress Micro high-content microscope (Molecular Devices) equipped with a 10x  
812 objective lens. Four images were acquired per well, yielding a total of 12 images per  
813 conditions. Images were processed automatically in ImageJ to identify and count nuclei  
814 as well as measure their maximum fluorescence intensity. ImageJ output files were  
815 pooled, and cumulative frequency curves for the maximum intensity of the cell population  
816 in each condition were computed using MATLAB. An intensity threshold was set based  
817 on the intensity of mitotic cells in control (DMSO-treated) wells to delineate interphase  
818 cells from mitotic cells. The fraction of mitotic cells was calculated as the fraction of cells  
819 above the set intensity threshold in MATLAB(Sackton et al., 2014).

820

### 821 ***Statistical analyses***

822 For experiments regarding the stability of IRS2-WT and IRS2- $\Delta$ D, *p*-values were  
823 calculated by two-way ANOVA. For fluorescence microscopy experiments that quantify  
824 mAG1 intensity in response to drug treatment over time, *p*-values were calculated by two-  
825 way ANOVA. For microscopy experiments that quantify mitotic duration following  
826 nocodazole treatment, *p*-values were calculated by one-way ANOVA. For proteomics  
827 data, *p*-values were calculated using a two-tailed, unpaired Student's t-test. For time  
828 lapse microscopy data, *p*-values were calculated by one-way ANOVA. Gene enrichment  
829 was calculated using the AmiGO 2 search tool (Carbon et al., 2009). Error bars indicate  
830 standard deviation (SD) or standard error of the mean (SEM) where indicated.

831

### 832 ***Materials Availability***

833 All mass spectrometry raw files will be available through the PRIDE archive upon  
834 publication. All other data are available in the associated supplementary data files.  
835 Further information and requests for resources and reagents should be directed to the  
836 Lead Contact, Randy King ([randy\\_king@hms.harvard.edu](mailto:randy_king@hms.harvard.edu)).

837

### 838 **Supplemental Information Legends**

839 **Figure S1: Related to Figure 1**

840 (A) Asynchronous RPE1 cells were treated with 1  $\mu$ M palbociclib and imaged by  
841 fluorescence time lapse microscopy for 20 hours. Frames at 0, 10, and 20 hours are  
842 shown.

843 (B) From the experiment shown in Figure S1B, FITC intensity was quantified at 0 hours  
844 (time of drug addition) and 20 hours. Each point represents the maximum FITC  
845 intensity of an individual cell at the given time point. ns : not significant ; \*\*\*\* :  
846  $p < 0.0001$ .

847 (C) Asynchronous RPE1 cells were treated with 1  $\mu$ M palbociclib for 20 hours. Following  
848 G<sub>1</sub> arrest, cells were treated with either DMSO or APC inhibitors (6  $\mu$ M proTAME + 50  
849  $\mu$ M apcin) and imaged by fluorescence widefield time lapse microscopy for an  
850 additional eight hours.

851 (D) Quantification of the experiment shown in S1D, as explained in S1B. Error bars = SD  
852 among all of the cells quantified for each condition. ns: not significant ; \*\*\*\* :  $p < 0.0001$ .

853

854 **Figure S2: Related to Figure 2B**

855 (A) Asynchronous C<sub>2</sub>C<sub>12</sub> myoblasts and 3-day differentiated C<sub>2</sub>C<sub>12</sub> myotubes were lysed  
856 and MyoD levels were measured by immunoblotting.

857 (B) Phase-contrast images of asynchronous (Day 0) C<sub>2</sub>C<sub>12</sub> myoblasts and 3-day  
858 differentiated C<sub>2</sub>C<sub>12</sub> myotubes.

859 (C) Asynchronous C<sub>2</sub>C<sub>12</sub> myoblasts were transfected with a plasmid coding for the N-  
860 terminal fragment of cyclin B1 (amino acids 1-88) fused to EGFP for 24 hours.  
861 Following transfection, cells were switched to low-serum differentiation media  
862 containing ITS for three days with media refreshment every 24 hours. After 3 days,  
863 myotubes were acutely treated with either DMSO or APC inhibitors (6  $\mu$ M proTAME +  
864 50  $\mu$ M apcin) for an additional 8 hours. Myotubes were then harvested, and lysates  
865 were analyzed for transgene expression by immunoblot.

866

867 **Figure S3: Related to Figure 3**

868 (D) HeLa cells were synchronized by double thymidine block and released into S-phase  
869 either in the presence of DMSO or 5  $\mu$ M RO3306. Cells were harvested at the

870 indicated time points for analysis of the given protein abundances and phosphorylation  
871 patterns in lysate by immunoblot.

872

873 **Figure S4: Related to Figure 4**

874 (A) (*left*) RPE1 cells stably expressing lentivirus generated, C-terminally HA-tagged IRS2  
875 wild type (WT) and R972A ( $\Delta$ D) constructs were arrested in G<sub>1</sub> with 1  $\mu$ M palbociclib  
876 for 20 hours. Cells were then acutely treated with either DMSO or the indicated dose  
877 range of APC inhibitors for an additional 8 hours. Cells were then harvested, and  
878 lysate was analyzed for HA expression by immunoblot. The lane denoted t<sub>0</sub> indicates  
879 a sample that was collected at the time of drug addition. (*right*) The experiment shown  
880 at left was repeated three times, and HA intensity was quantified. Plot shows HA  
881 intensity normalized to a loading control (either GAPDH or Ponceau) and to the DMSO  
882 condition. Error bars = mean  $\pm$  SEM.

883 (B) (*top*) Asynchronous RPE1 cells expressing doxycycline-inducible, C-terminally HA  
884 tagged IRS2 variants were treated with a dose range of doxycycline. HA and IRS2  
885 expression levels were analyzed by immunoblotting cell lysates. Red = doxycycline  
886 dose used for all experiments. (*bottom*) Asynchronous C<sub>2</sub>C<sub>12</sub> cells expressing  
887 doxycycline-inducible, C-terminally HA tagged IRS2 variants were treated with a dose  
888 range of doxycycline. HA and IRS2 expression levels were analyzed by  
889 immunoblotting cell lysates. Red = doxycycline dose used for all experiments.

890

891 **Figure S5: Related to Figure 5**

892 (A) Hierarchical clustering for the nine conditions analyzed by TMT-coupled quantitative  
893 mass spectrometry in wild type and  $\Delta$ IRS2 cell lines.

894 (B) Venn diagrams depicting proteins that (*left*) decrease significantly >20% relative to  
895 WT cells in both  $\Delta$ IRS2 cell lines and (*right*) increase significantly >20% relative to WT  
896 in both  $\Delta$ IRS2 cell lines.

897 (C) Gene ontology (GO) term enrichment of proteins that increase in both  $\Delta$ IRS2 cell lines  
898 relative to WT cells.

899 (D) Fraction abundance of cell-cycle related proteins shown in Figure 5D depleted in  
900  $\Delta$ IRS2 cell lines relative to WT cells.  $\Delta$ IRS2-1 median abundance = 0.70 ;  $\Delta$ IRS2-2  
901 median abundance = 0.66.

902

903 **Figure S6:** *Related to Figure 6*

904 (A) Representative frames from high-content nuclear imaging experiment for mitotic  
905 fraction based on DAPI intensity. Asynchronous RPE1 WT or IRS2 KO cell lines were  
906 treated with 900 nM nocodazole for 18 hours before fixing and DAPI staining.

907 (B) Asynchronous RPE1 WT or IRS2 KO cell lines were imaged every five minutes by  
908 widefield time lapse microscopy for 36 hours. Each point represents an individual cell's  
909 mitotic duration, measured as the time from nuclear envelope breakdown (NEB) to  
910 division, slippage, or cell death. Error bars = mean  $\pm$  SD. *p*-values were calculated  
911 using one-way ANOVA. ns = not statistically significant.

912

913 **Figure S7:** *Related to Figures 1-3*

914 Extended immunoblots from Figures 1, 2, and 3

915

916 **Figure S8:** *Related to Figures 4-5*

917 Extended immunoblots from Figures 4 and 5.

918

919 **Table S1:** APC inhibition in G<sub>1</sub> proteomics

920

921 **Table S2:** Reported APC/C substrates identified by proteomics

922

923 **Table S3:** 204 protein subset

924

925 **Table S4:** IRS2 knockout cell proteomics

926

927

928

929

930 **References**

931  
932 Alfieri, C., Zhang, S., and Barford, D. (2017). Visualizing the complex functions and  
933 mechanisms of the anaphase promoting complex/cyclosome (APC/C). *Open Biol* 7.

934 Besse-Patin, A., Jeromson, S., Levesque-Damphousse, P., Secco, B., Laplante, M., and  
935 Estall, J.L. (2019). PGC1A regulates the IRS1:IRS2 ratio during fasting to influence  
936 hepatic metabolism downstream of insulin. *Proc Natl Acad Sci U S A* 116, 4285-4290.

937 Bouzakri, K., Zachrisson, A., Al-Khalili, L., Zhang, B.B., Koistinen, H.A., Krook, A., and  
938 Zierath, J.R. (2006). siRNA-based gene silencing reveals specialized roles of IRS-1/Akt2  
939 and IRS-2/Akt1 in glucose and lipid metabolism in human skeletal muscle. *Cell Metab* 4,  
940 89-96.

941 Carbon, S., Ireland, A., Mungall, C.J., Shu, S., Marshall, B., Lewis, S., Ami, G.O.H., and  
942 Web Presence Working, G. (2009). AmiGO: online access to ontology and annotation  
943 data. *Bioinformatics* 25, 288-289.

944 Chang, L., and Barford, D. (2014). Insights into the anaphase-promoting complex: a  
945 molecular machine that regulates mitosis. *Curr Opin Struct Biol* 29, 1-9.

946 Chen, L., Li, Z., Ahmad, N., and Liu, X. (2015). Plk1 phosphorylation of IRS2 prevents  
947 premature mitotic exit via AKT inactivation. *Biochemistry* 54, 2473-2480.

948 Chirivella, L., Kirstein, M., Ferron, S.R., Domingo-Muelas, A., Durupt, F.C., Acosta-  
949 Umanzor, C., Cano-Jaimez, M., Perez-Sanchez, F., Barbacid, M., Ortega, S., *et al.*  
950 (2017). Cyclin-Dependent Kinase 4 Regulates Adult Neural Stem Cell Proliferation and  
951 Differentiation in Response to Insulin. *Stem Cells* 35, 2403-2416.

952 Choi, B.H., Pagano, M., Huang, C., and Dai, W. (2014). Cdh1, a substrate-recruiting  
953 component of anaphase-promoting complex/cyclosome (APC/C) ubiquitin E3 ligase,  
954 specifically interacts with phosphatase and tensin homolog (PTEN) and promotes its  
955 removal from chromatin. *J Biol Chem* 289, 17951-17959.



- 956 Choi, E., Choe, H., Min, J., Choi, J.Y., Kim, J., and Lee, H. (2009). BubR1 acetylation at  
957 prometaphase is required for modulating APC/C activity and timing of mitosis. *EMBO J*  
958 *28*, 2077-2089.
- 959 Choi, E., Kikuchi, S., Gao, H., Brodzik, K., Nassour, I., Yopp, A., Singal, A.G., Zhu, H.,  
960 and Yu, H. (2019). Mitotic regulators and the SHP2-MAPK pathway promote IR  
961 endocytosis and feedback regulation of insulin signaling. *Nature Communications* *10*,  
962 1473.
- 963 Choi, E., Zhang, X., Xing, C., and Yu, H. (2016). Mitotic Checkpoint Regulators Control  
964 Insulin Signaling and Metabolic Homeostasis. *Cell* *166*, 567-581.
- 965 Clijsters, L., Ogink, J., and Wolthuis, R. (2013). The spindle checkpoint, APC/C(Cdc20),  
966 and APC/C(Cdh1) play distinct roles in connecting mitosis to S phase. *J Cell Biol* *201*,  
967 1013-1026.
- 968 Coppins, K.D., and White, M.F. (2012). Regulation of insulin sensitivity by serine/threonine  
969 phosphorylation of insulin receptor substrate proteins IRS1 and IRS2. *Diabetologia* *55*,  
970 2565-2582.
- 971 Davey, N.E., and Morgan, D.O. (2016). Building a Regulatory Network with Short Linear  
972 Sequence Motifs: Lessons from the Degrons of the Anaphase-Promoting Complex. *Mol*  
973 *Cell* *64*, 12-23.
- 974 DeWard, A.D., and Alberts, A.S. (2009). Ubiquitin-mediated degradation of the formin  
975 mDia2 upon completion of cell division. *J Biol Chem* *284*, 20061-20069.
- 976 Eguren, M., Alvarez-Fernandez, M., Garcia, F., Lopez-Contreras, A.J., Fujimitsu, K.,  
977 Yaguchi, H., Luque-Garcia, J.L., Fernandez-Capetillo, O., Munoz, J., Yamano, H., *et al.*  
978 (2014). A synthetic lethal interaction between APC/C and topoisomerase poisons  
979 uncovered by proteomic screens. *Cell Rep* *6*, 670-683.

- 980 Erickson, B.K., Mintseris, J., Schweppe, D.K., Navarrete-Perea, J., Erickson, A.R.,  
981 Nusinow, D.P., Paulo, J.A., and Gygi, S.P. (2019). Active Instrument Engagement  
982 Combined with a Real-Time Database Search for Improved Performance of Sample  
983 Multiplexing Workflows. *J Proteome Res* 18, 1299-1306.
- 984 Ezhevsky, S.A., Nagahara, H., Vocero-Akbani, A.M., Gius, D.R., Wei, M.C., and Dowdy,  
985 S.F. (1997). Hypo-phosphorylation of the retinoblastoma protein (pRb) by cyclin D:Cdk4/6  
986 complexes results in active pRb. *Proc Natl Acad Sci U S A* 94, 10699-10704.
- 987 Folli, F., Okada, T., Perego, C., Gunton, J., Liew, C.W., Akiyama, M., D'Amico, A., La  
988 Rosa, S., Placidi, C., Lupi, R., *et al.* (2011). Altered insulin receptor signalling and beta-  
989 cell cycle dynamics in type 2 diabetes mellitus. *PLoS One* 6, e28050.
- 990 Glotzer, M., Murray, A.W., and Kirschner, M.W. (1991). Cyclin is degraded by the ubiquitin  
991 pathway. *Nature* 349, 132-138.
- 992 Haeusler, R.A., McGraw, T.E., and Accili, D. (2017). Biochemical and cellular properties  
993 of insulin receptor signalling. *Nature Reviews Molecular Cell Biology* 19, 31.
- 994 Holt, L.J. (2012). Regulatory modules: Coupling protein stability to phosphoregulation  
995 during cell division. *FEBS Lett* 586, 2773-2777.
- 996 Hornbeck, P.V., Zhang, B., Murray, B., Kornhauser, J.M., Latham, V., and Skrzypek, E.  
997 (2015). PhosphoSitePlus, 2014: mutations, PTMs and recalibrations. *Nucleic Acids Res*  
998 43, D512-520.
- 999 Huttlin, E.L., Jedrychowski, M.P., Elias, J.E., Goswami, T., Rad, R., Beausoleil, S.A.,  
1000 Villen, J., Haas, W., Sowa, M.E., and Gygi, S.P. (2010). A tissue-specific atlas of mouse  
1001 protein phosphorylation and expression. *Cell* 143, 1174-1189.
- 1002 Jeng, J.C., Lin, Y.M., Lin, C.H., and Shih, H.M. (2009). Cdh1 controls the stability of  
1003 TACC3. *Cell Cycle* 8, 3537-3544.

- 1004 Ke, P.Y., Kuo, Y.Y., Hu, C.M., and Chang, Z.F. (2005). Control of dTTP pool size by  
1005 anaphase promoting complex/cyclosome is essential for the maintenance of genetic  
1006 stability. *Genes Dev* 19, 1920-1933.
- 1007 Khumukcham, S.S., Samanthapudi, V.S.K., Penugurti, V., Kumari, A., Kesavan, P.S.,  
1008 Velatooru, L.R., Kotla, S.R., Mazumder, A., and Manavathi, B. (2019). Hematopoietic  
1009 PBX-interacting protein is a substrate and an inhibitor of the APC/C-Cdc20 complex and  
1010 regulates mitosis by stabilizing cyclin B1. *J Biol Chem* 294, 10236-10252.
- 1011 Klitzing, C., Huss, R., Illert, A.L., Froschl, A., Wotzel, S., Peschel, C., Bassermann, F.,  
1012 and Duyster, J. (2011). APC/C(Cdh1)-mediated degradation of the F-box protein NIPA is  
1013 regulated by its association with Skp1. *PLoS One* 6, e28998.
- 1014 Krystkowiak, I., and Davey, N.E. (2017). SLIMSearch: a framework for proteome-wide  
1015 discovery and annotation of functional modules in intrinsically disordered regions. *Nucleic  
1016 Acids Res* 45, W464-W469.
- 1017 Kubota, N., Kubota, T., Itoh, S., Kumagai, H., Kozono, H., Takamoto, I., Mineyama, T.,  
1018 Ogata, H., Tokuyama, K., Ohsugi, M., *et al.* (2008). Dynamic functional relay between  
1019 insulin receptor substrate 1 and 2 in hepatic insulin signaling during fasting and feeding.  
1020 *Cell Metab* 8, 49-64.
- 1021 Lavin, D.P., White, M.F., and Brazil, D.P. (2016). IRS proteins and diabetic complications.  
1022 *Diabetologia* 59, 2280-2291.
- 1023 Lei, L., Han, F., Cui, Q., Liao, W., Liu, H., Guan, G., and Yang, L. (2018). IRS2 depletion  
1024 inhibits cell proliferation and decreases hormone secretion in mouse granulosa cells. *J  
1025 Reprod Dev* 64, 409-416.
- 1026 Long, Y.C., Cheng, Z., Copps, K.D., and White, M.F. (2011). Insulin receptor substrates  
1027 Irs1 and Irs2 coordinate skeletal muscle growth and metabolism via the Akt and AMPK  
1028 pathways. *Mol Cell Biol* 31, 430-441.

- 1029 Mailand, N., and Diffley, J.F. (2005). CDKs promote DNA replication origin licensing in  
1030 human cells by protecting Cdc6 from APC/C-dependent proteolysis. *Cell* 122, 915-926.
- 1031 McAlister, G.C., Nusinow, D.P., Jedrychowski, M.P., Wuhr, M., Huttlin, E.L., Erickson,  
1032 B.K., Rad, R., Haas, W., and Gygi, S.P. (2014). MultiNotch MS3 enables accurate,  
1033 sensitive, and multiplexed detection of differential expression across cancer cell line  
1034 proteomes. *Anal Chem* 86, 7150-7158.
- 1035 McGarry, T.J., and Kirschner, M.W. (1998). Geminin, an Inhibitor of DNA Replication, Is  
1036 Degraded during Mitosis. *Cell* 93, 1043-1053.
- 1037 Nakao, R., Hirasaka, K., Goto, J., Ishidoh, K., Yamada, C., Ohno, A., Okumura, Y.,  
1038 Nonaka, I., Yasutomo, K., Baldwin, K.M., *et al.* (2009). Ubiquitin ligase Cbl-b is a negative  
1039 regulator for insulin-like growth factor 1 signaling during muscle atrophy caused by  
1040 unloading. *Mol Cell Biol* 29, 4798-4811.
- 1041 Navarrete-Perea, J., Yu, Q., Gygi, S.P., and Paulo, J.A. (2018). Streamlined Tandem  
1042 Mass Tag (SL-TMT) Protocol: An Efficient Strategy for Quantitative (Phospho)proteome  
1043 Profiling Using Tandem Mass Tag-Synchronous Precursor Selection-MS3. *J Proteome*  
1044 *Res* 17, 2226-2236.
- 1045 Prinz, S., Hwang, E.S., Visintin, R., and Amon, A. (1998). The regulation of Cdc20  
1046 proteolysis reveals a role for the APC components Cdc23 and Cdc27 during S phase and  
1047 early mitosis. *Current Biology* 8, 750-760.
- 1048 Puklowski, A., Homsy, Y., Keller, D., May, M., Chauhan, S., Kossatz, U., Grunwald, V.,  
1049 Kubicka, S., Pich, A., Manns, M.P., *et al.* (2011). The SCF-FBXW5 E3-ubiquitin ligase is  
1050 regulated by PLK4 and targets HsSAS-6 to control centrosome duplication. *Nat Cell Biol*  
1051 13, 1004-1009.

- 1052 Rui, L., Yuan, M., Frantz, D., Shoelson, S., and White, M.F. (2002). SOCS-1 and SOCS-  
1053 3 block insulin signaling by ubiquitin-mediated degradation of IRS1 and IRS2. *J Biol Chem*  
1054 *277*, 42394-42398.
- 1055 Sackton, K.L., Dimova, N., Zeng, X., Tian, W., Zhang, M., Sackton, T.B., Meaders, J.,  
1056 Pfaff, K.L., Sigoillot, F., Yu, H., *et al.* (2014). Synergistic blockade of mitotic exit by two  
1057 chemical inhibitors of the APC/C. *Nature* *514*, 646-649.
- 1058 Sakaue-Sawano, A., Kurokawa, H., Morimura, T., Hanyu, A., Hama, H., Osawa, H.,  
1059 Kashiwagi, S., Fukami, K., Miyata, T., Miyoshi, H., *et al.* (2008). Visualizing  
1060 spatiotemporal dynamics of multicellular cell-cycle progression. *Cell* *132*, 487-498.
- 1061 Savitski, M.M., Wilhelm, M., Hahne, H., Kuster, B., and Bantscheff, M. (2015). A Scalable  
1062 Approach for Protein False Discovery Rate Estimation in Large Proteomic Data Sets. *Mol*  
1063 *Cell Proteomics* *14*, 2394-2404.
- 1064 Scheufele, F., Wolf, B., Kruse, M., Hartmann, T., Lempart, J., Muhlich, S., Pfeiffer, A.F.H.,  
1065 Field, L.J., Charron, M.J., Pan, Z.Q., *et al.* (2014). Evidence for a regulatory role of Cullin-  
1066 RING E3 ubiquitin ligase 7 in insulin signaling. *Cell Signal* *26*, 233-239.
- 1067 Schneider, C.A., Rasband, W.S., and Eliceiri, K.W. (2012). NIH Image to ImageJ: 25  
1068 years of image analysis. *Nature Methods* *9*, 671-675.
- 1069 Schweppe, D.K., Eng, J.K., Bailey, D., Rad, R., Yu, Q., Navarrete-Perea, J., Huttlin, E.L.,  
1070 Erickson, B.K., Paulo, J.A., and Gygi, S.P. (2019).
- 1071 Seki, A., and Fang, G. (2007). CKAP2 is a spindle-associated protein degraded by  
1072 APC/C-Cdh1 during mitotic exit. *J Biol Chem* *282*, 15103-15113.
- 1073 Shi, J., Luo, L., Eash, J., Ibebunjo, C., and Glass, D.J. (2011). The SCF-Fbxo40 complex  
1074 induces IRS1 ubiquitination in skeletal muscle, limiting IGF1 signaling. *Dev Cell* *21*, 835-  
1075 847.

- 1076 Shirakawa, J., Fernandez, M., Takatani, T., El Ouaamari, A., Jungtrakoon, P., Okawa,  
1077 E.R., Zhang, W., Yi, P., Doria, A., and Kulkarni, R.N. (2017). Insulin Signaling Regulates  
1078 the FoxM1/PLK1/CENP-A Pathway to Promote Adaptive Pancreatic beta Cell  
1079 Proliferation. *Cell Metab* 25, 868-882 e865.
- 1080 Singh, S.A., Winter, D., Kirchner, M., Chauhan, R., Ahmed, S., Ozlu, N., Tzur, A., Steen,  
1081 J.A., and Steen, H. (2014). Co-regulation proteomics reveals substrates and mechanisms  
1082 of APC/C-dependent degradation. *EMBO J* 33, 385-399.
- 1083 Song, L., and Rape, M. (2010). Regulated degradation of spindle assembly factors by the  
1084 anaphase-promoting complex. *Mol Cell* 38, 369-382.
- 1085 Song, M.S., Carracedo, A., Salmena, L., Song, S.J., Egia, A., Malumbres, M., and  
1086 Pandolfi, P.P. (2011). Nuclear PTEN regulates the APC-CDH1 tumor-suppressive  
1087 complex in a phosphatase-independent manner. *Cell* 144, 187-199.
- 1088 Sun, X.J., Wang, L.M., Zhang, Y., Yenush, L., Myers, M.G., Jr., Glasheen, E., Lane, W.S.,  
1089 Pierce, J.H., and White, M.F. (1995). Role of IRS-2 in insulin and cytokine signalling.  
1090 *Nature* 377, 173-177.
- 1091 Wan, Y., Liu, X., and Kirschner, M.W. (2001). The Anaphase-Promoting Complex  
1092 Mediates TGF- $\beta$  Signaling by Targeting SnoN for Destruction. *Molecular Cell* 8, 1027-  
1093 1039.
- 1094 Wang, H., Liu, D., Wang, Y., Qin, J., and Elledge, S.J. (2001). Pds1 phosphorylation in  
1095 response to DNA damage is essential for its DNA damage checkpoint function. *Genes*  
1096 *Dev* 15, 1361-1372.
- 1097 Wu, S., Zhou, B., Xu, L., and Sun, H. (2009). IRS-2, but not IRS-1, can sustain  
1098 proliferation and rescue UBF stabilization in InR or InR defective signaling of 32D myeloid  
1099 cells. *Cell Cycle* 8, 3218-3226.

1100 Xu, X., Sarikas, A., Dias-Santagata, D.C., Dolios, G., Lafontant, P.J., Tsai, S.C., Zhu, W.,  
1101 Nakajima, H., Nakajima, H.O., Field, L.J., *et al.* (2008). The CUL7 E3 ubiquitin ligase  
1102 targets insulin receptor substrate 1 for ubiquitin-dependent degradation. *Mol Cell* 30, 403-  
1103 414.

1104 Yi, J.S., Park, J.S., Ham, Y.M., Nguyen, N., Lee, N.R., Hong, J., Kim, B.W., Lee, H., Lee,  
1105 C.S., Jeong, B.C., *et al.* (2013). MG53-induced IRS-1 ubiquitination negatively regulates  
1106 skeletal myogenesis and insulin signalling. *Nat Commun* 4, 2354.

1107 Zeng, X., Sigoillot, F., Gaur, S., Choi, S., Pfaff, K.L., Oh, D.C., Hathaway, N., Dimova, N.,  
1108 Cuny, G.D., and King, R.W. (2010). Pharmacologic inhibition of the anaphase-promoting  
1109 complex induces a spindle checkpoint-dependent mitotic arrest in the absence of spindle  
1110 damage. *Cancer Cell* 18, 382-395.

1111 Zhang, P.J., Zhao, J., Li, H.Y., Man, J.H., He, K., Zhou, T., Pan, X., Li, A.L., Gong, W.L.,  
1112 Jin, B.F., *et al.* (2007). CUE domain containing 2 regulates degradation of progesterone  
1113 receptor by ubiquitin-proteasome. *EMBO J* 26, 1831-1842.

1114 Zhang, W.N., Zhou, J., Zhou, T., Li, A.L., Wang, N., Xu, J.J., Chang, Y., Man, J.H., Pan,  
1115 X., Li, T., *et al.* (2013). Phosphorylation-triggered CUEDC2 degradation promotes UV-  
1116 induced G1 arrest through APC/C(Cdh1) regulation. *Proc Natl Acad Sci U S A* 110,  
1117 11017-11022.

1118

1119

1120

1121

1122

1123

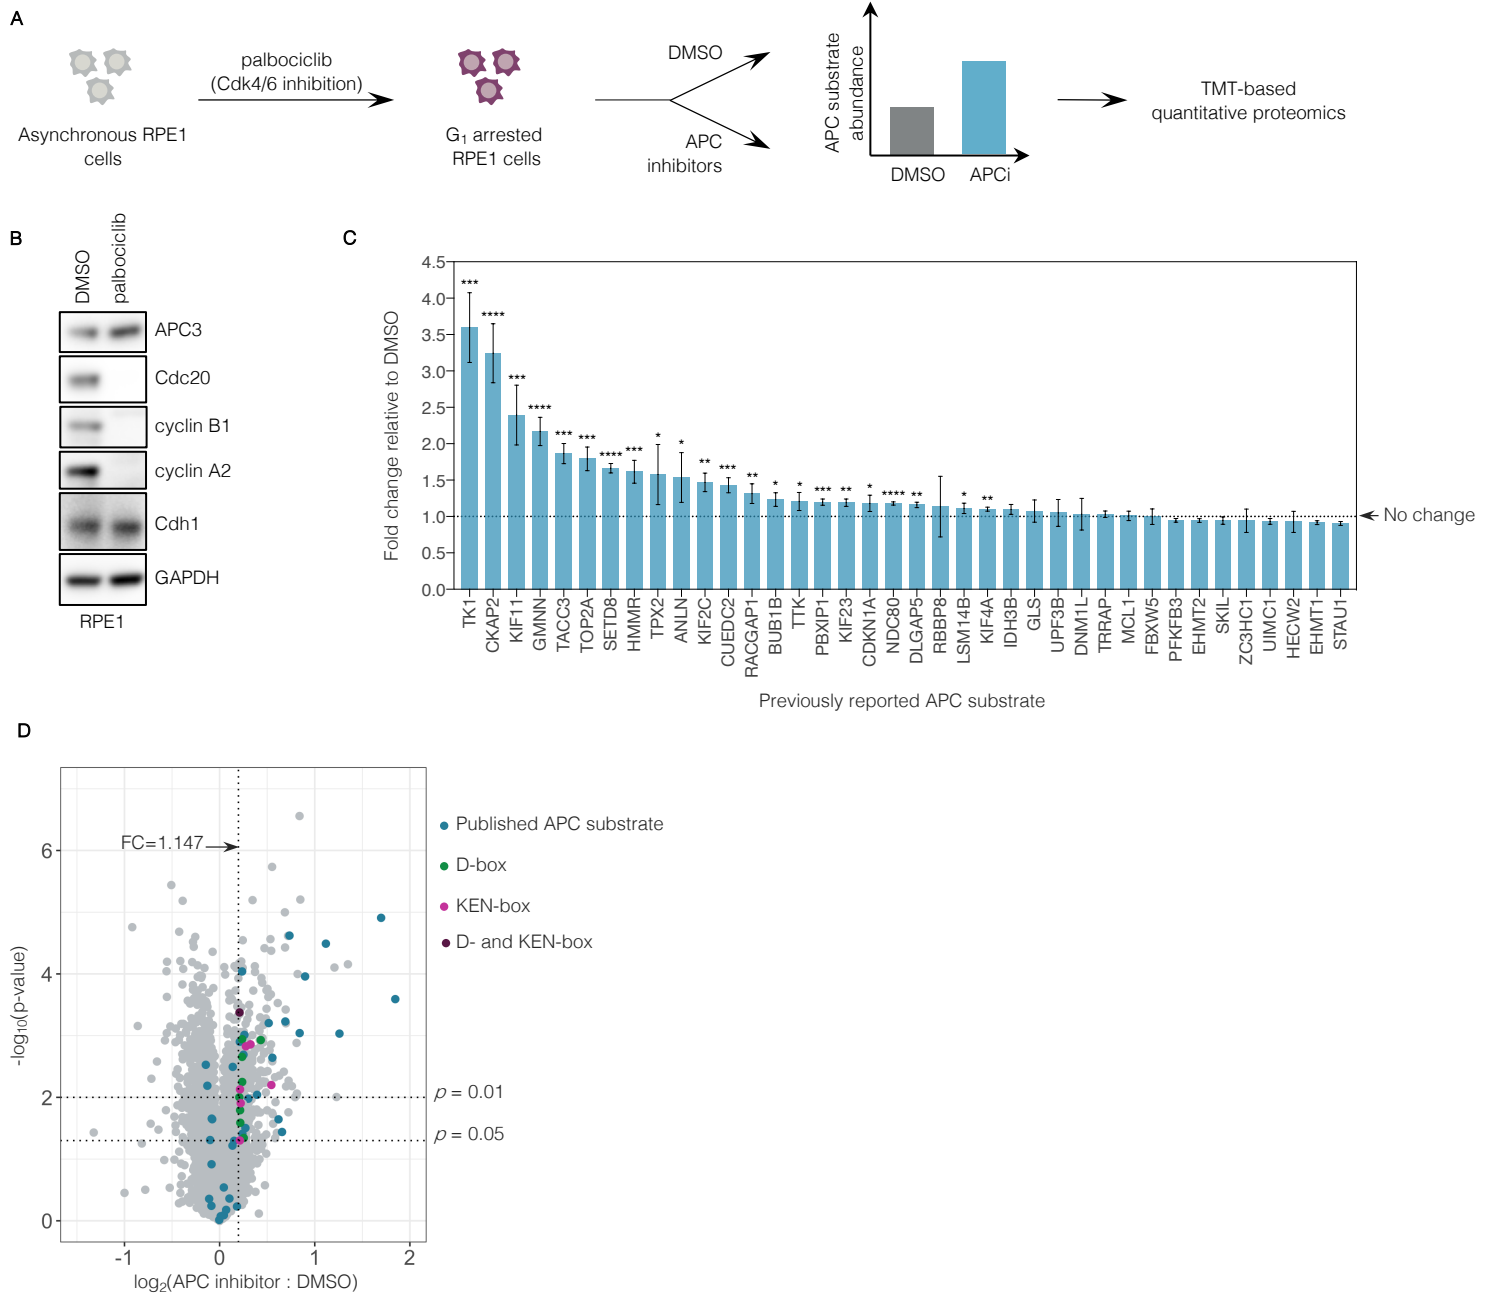



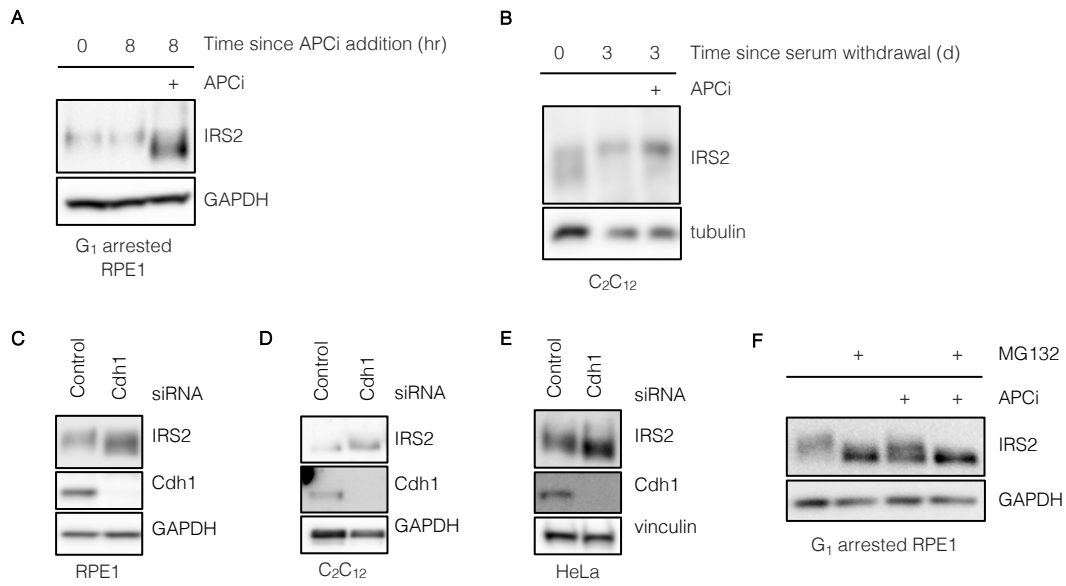

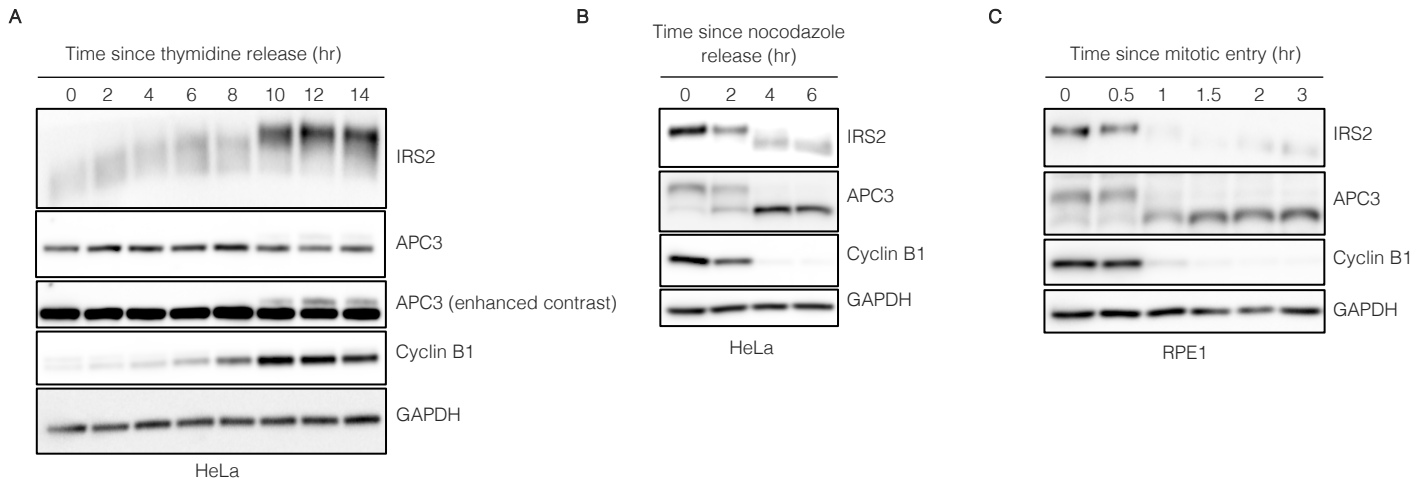

Figure 4

A

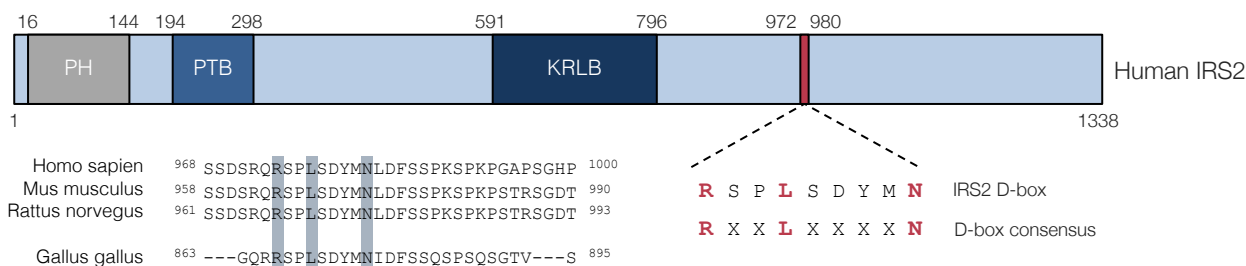

B

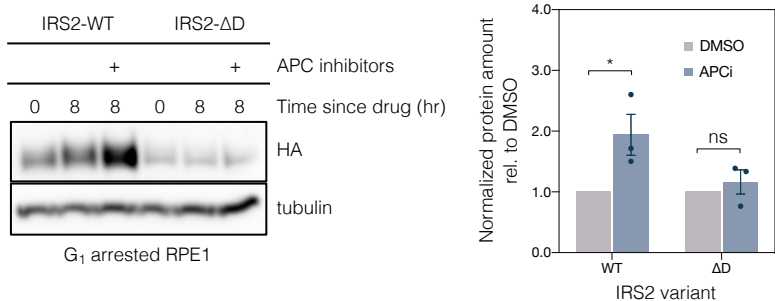

D

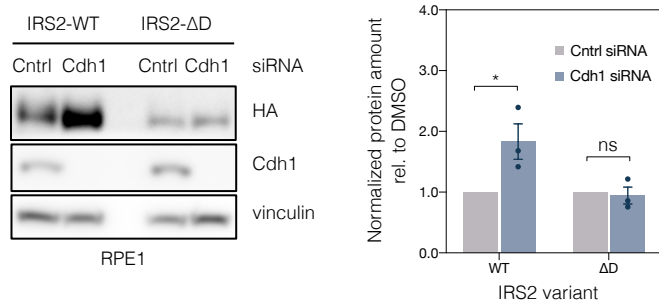

C

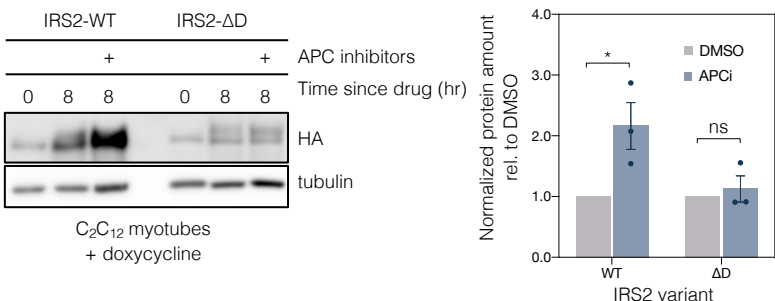

E

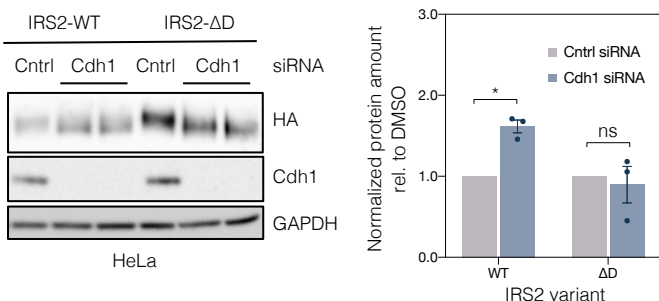

F

Human IRS2 965 TSSDSRQRSP~~LS~~SDYMN~~LD~~FSSPKSPKPGAPSGHPVG 1000  
Human IRS1 928 QPAPREEETGTEEYMKMDLGPGRRAAWQESTGVEMG 963

G

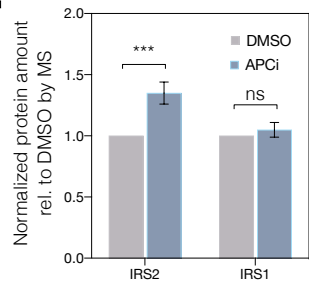

H

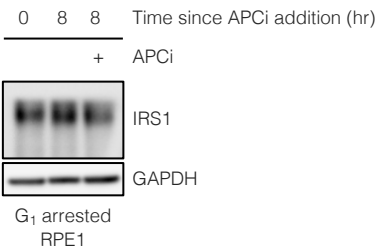

I

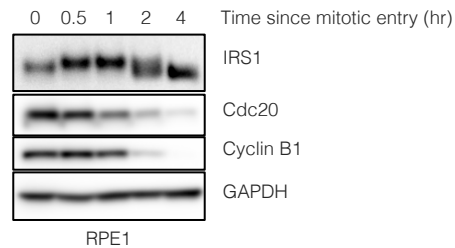

Figure 5

A

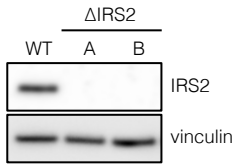

B

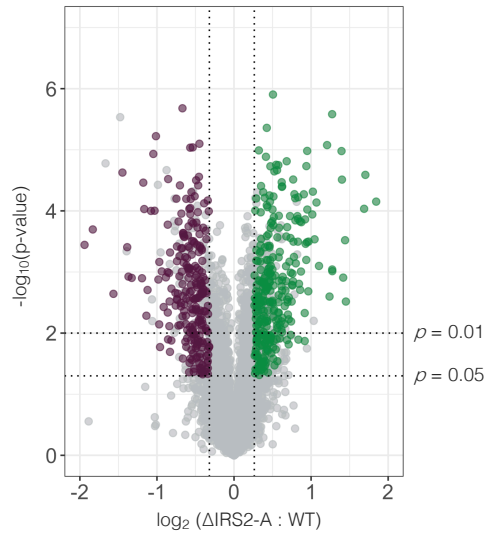

C

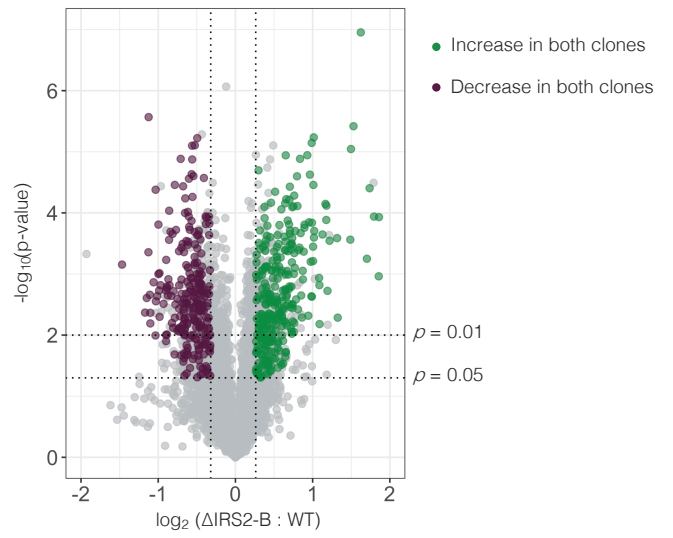

D

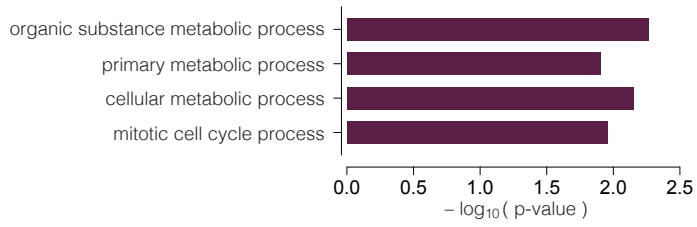

E

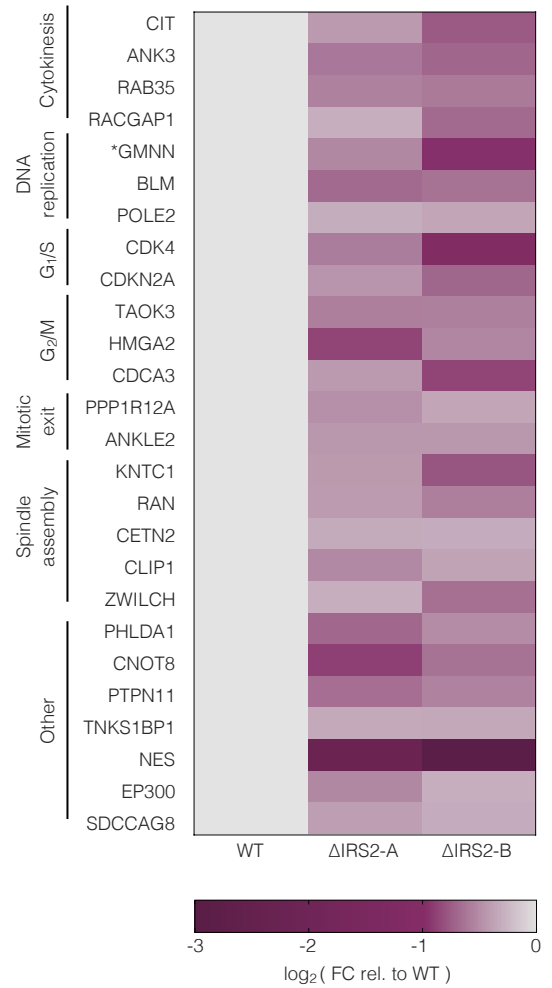

Figure 6

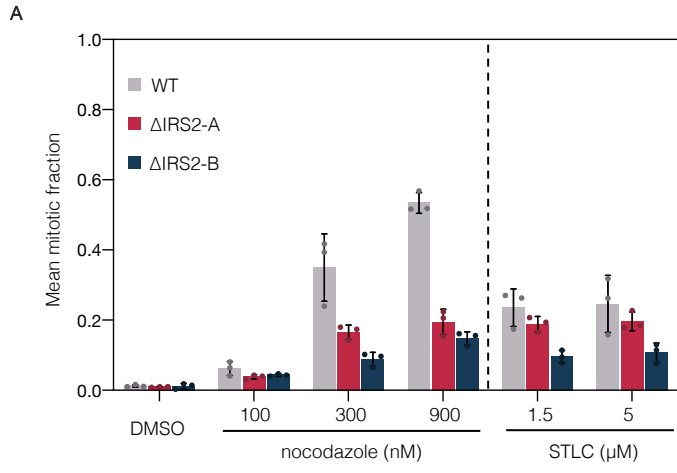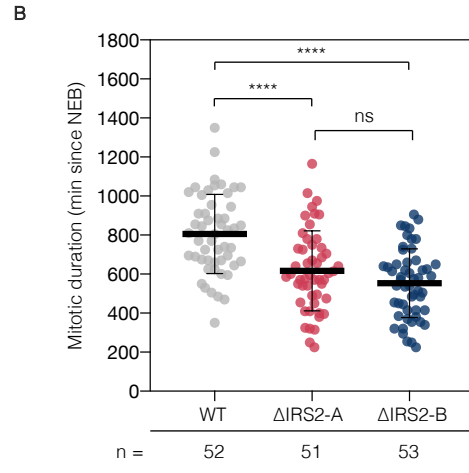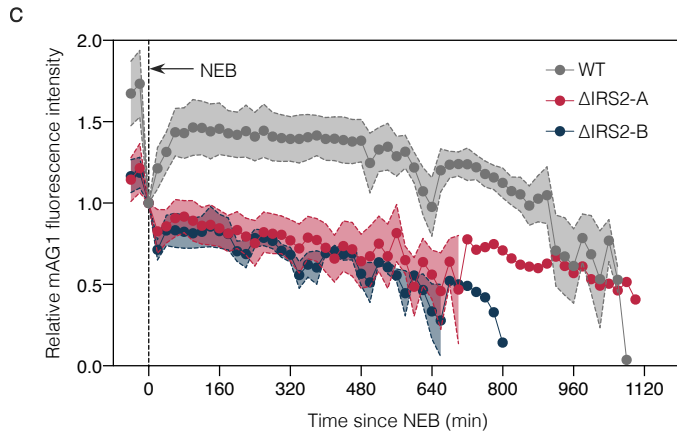

Figure 7

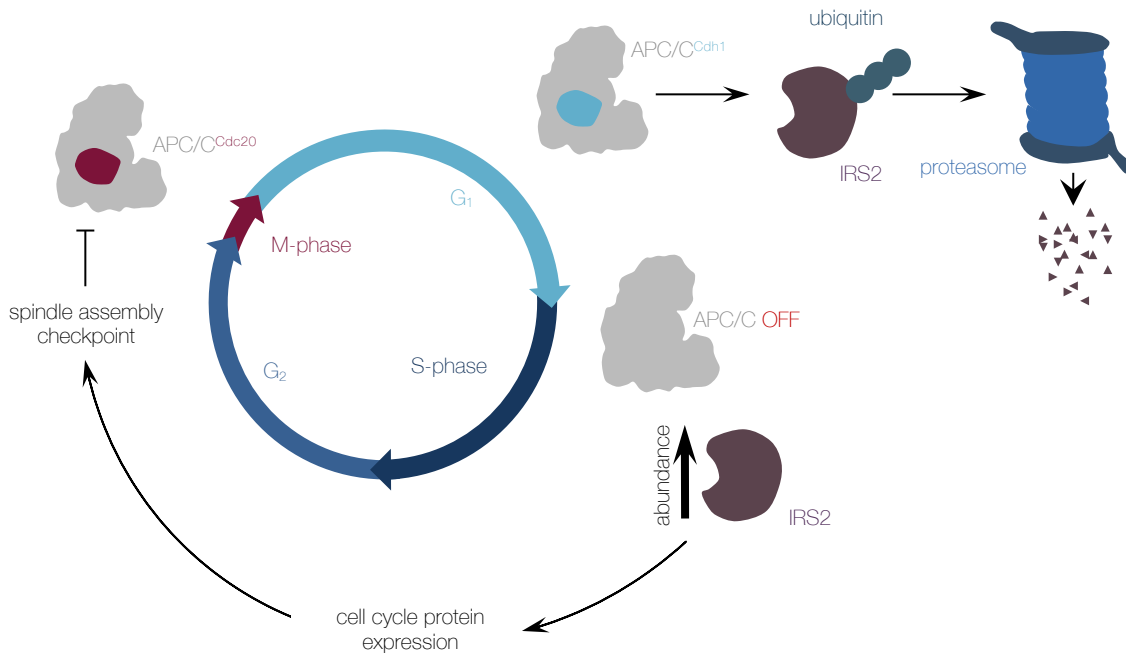

Source: https://www.biorxiv.org/content/biorxiv/early/2019/11/15/829572.full.pdf
